# Supplementary material for: Contrasting genetic structure between mitochondrial and nuclear markers in the dengue fever mosquito from Rio de Janeiro: implications for vector control
Source: PubMed Central journal article supplement (PMC4610386; doi:10.1111/eva.12301), 2015-09-07
Supplement: eva0008-0901-sd1.pdf [file eva0008-0901-sd1.pdf]

S1 Fig. DAPC analysis with nuclear genome-wide SNPs in *Aedes aegypti* from Rio de Janeiro, with the BIC values for the successive number of genetic groups (upper) and the alpha-score optimization process for retaining the optimal number of PCs in the analysis (lower).

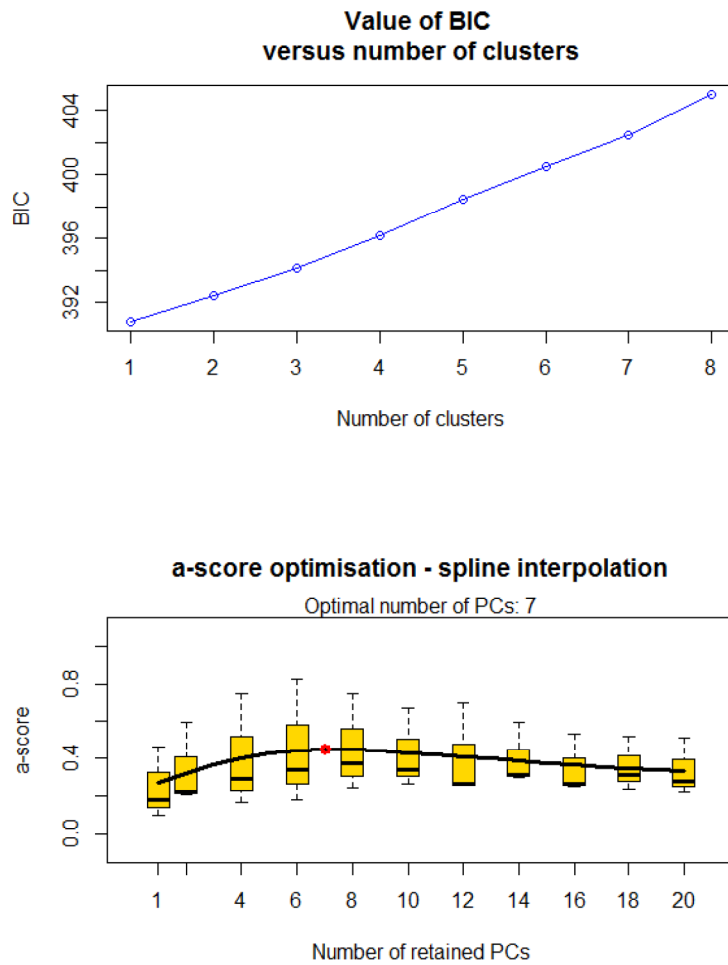

S2 Fig. TESS analysis for the microsatellite datasets from *Aedes aegypti* collected in Rio de Janeiro across three seasons. Probabilities for individual membership to a different number of genetic clusters ( $K=2,3$ , or  $5$ ) are depicted as vertical lines.

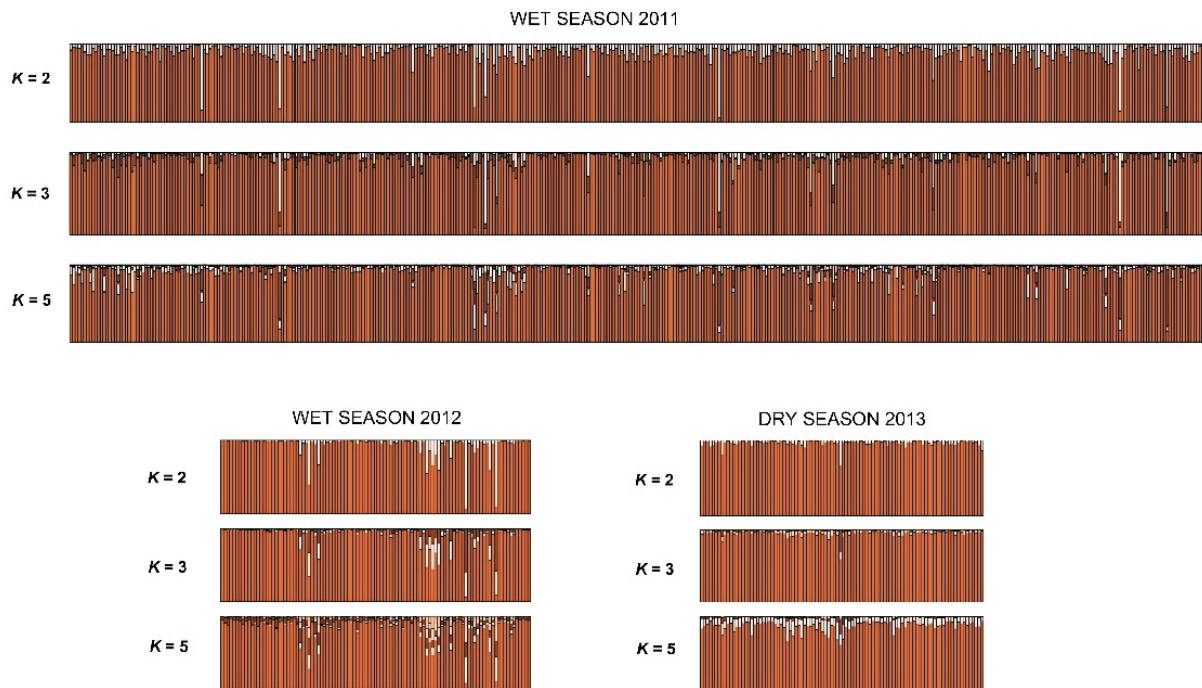

S3 Fig. Average number of *Aedes aegypti* females caught daily in BG traps at four locations in Rio de Janeiro over a period of 95 weeks (since October 2012).

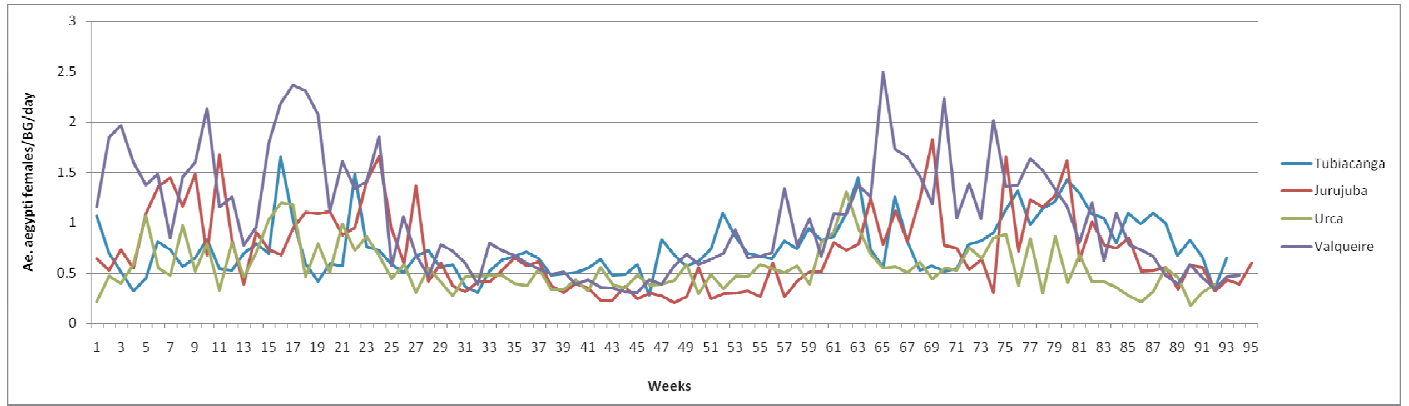

**S2Table. List of *Aedes aegypti* mitochondrial genes with ddRAD loci**, their orientation in the mitochondrial genome, start codon position within the recovered sequences and the mitochondrial genome (in base-pairs). Fragment lengths greater than 80 bp were reconstructed by concatenating the partly overlapping paired Illumina reads.

| gene        | gene orientation | codon start position in the sequence | sequence start position in the genome (bp) | fragment length (bp) |
|-------------|------------------|--------------------------------------|--------------------------------------------|----------------------|
| <i>ND2</i>  | +                | 2                                    | 357                                        | 80                   |
|             |                  | 2                                    | 606                                        | 82                   |
| <i>COX1</i> | +                | 3                                    | 1317                                       | 80                   |
|             |                  | 2                                    | 2128                                       | 97                   |
|             |                  | 1                                    | 2393                                       | 125                  |
|             |                  | 3                                    | 2592                                       | 80                   |
| <i>ATP6</i> | +                | 2                                    | 4255                                       | 145                  |
| <i>COX3</i> | +                | 3                                    | 4758                                       | 163                  |
|             |                  | 1                                    | 5255                                       | 99                   |
| <i>ND5</i>  | -                | 2                                    | 6329                                       | 80                   |
|             |                  | 3                                    | 6675                                       | 80                   |
|             |                  | 2                                    | 7277                                       | 80                   |
|             |                  | 2                                    | 7490                                       | 80                   |
|             |                  | 3                                    | 7746                                       | 80                   |
|             |                  | 2                                    | 7830                                       | 82                   |
| <i>ND4</i>  | -                | 3                                    | 8903                                       | 80                   |
| <i>ND4L</i> | -                | na                                   | 9422                                       | 80                   |
|             |                  | na                                   | 9522                                       | 80                   |
| <i>ND6</i>  | +                | 2                                    | 9962                                       | 109                  |
| <i>CYTB</i> | +                | 2                                    | 10457                                      | 144                  |
|             |                  | 3                                    | 10831                                      | 80                   |
| <i>ND1</i>  | -                | 3                                    | 11808                                      | 80                   |
|             |                  | 1                                    | 11908                                      | 80                   |

S3 Table. Pairwise  $F_{ST}$  (bellow diagonal) and the corresponding  $p$ -values (from 999 permutations) across eight microsatellite loci among samples of *Aedes aegypti* collected from 15 location in Rio de Janeiro during wet season 2011. Location codes are listed in Table 1.

|    | PA    | JG    | HM    | JU    | MI    | OL    | PQ    | PV    | PI    | SC    | TQ    | TB    | UR    | VQ    | VL    |
|----|-------|-------|-------|-------|-------|-------|-------|-------|-------|-------|-------|-------|-------|-------|-------|
| PA |       | 0.486 | 0.038 | 0.082 | 0.076 | 0.039 | 0.039 | 0.013 | 0.288 | 0.094 | 0.029 | 0.003 | 0.058 | 0.076 | 0.184 |
| JG | 0.011 |       | 0.853 | 0.161 | 0.881 | 0.874 | 0.334 | 0.344 | 0.717 | 0.582 | 0.113 | 0.744 | 0.884 | 0.793 | 0.578 |
| HM | 0.027 | 0.012 |       | 0.128 | 0.649 | 0.558 | 0.039 | 0.119 | 0.051 | 0.320 | 0.137 | 0.235 | 0.754 | 0.406 | 0.146 |
| JU | 0.024 | 0.023 | 0.031 |       | 0.021 | 0.141 | 0.097 | 0.029 | 0.006 | 0.498 | 0.246 | 0.064 | 0.280 | 0.162 | 0.144 |
| MI | 0.014 | 0.007 | 0.012 | 0.028 |       | 0.330 | 0.026 | 0.667 | 0.643 | 0.671 | 0.125 | 0.135 | 0.794 | 0.390 | 0.624 |
| OL | 0.015 | 0.007 | 0.014 | 0.021 | 0.010 |       | 0.002 | 0.272 | 0.297 | 0.389 | 0.015 | 0.120 | 0.555 | 0.210 | 0.522 |
| PQ | 0.022 | 0.015 | 0.031 | 0.027 | 0.021 | 0.026 |       | 0.002 | 0.003 | 0.035 | 0.005 | 0.021 | 0.005 | 0.009 | 0.004 |
| PV | 0.017 | 0.012 | 0.021 | 0.027 | 0.007 | 0.010 | 0.035 |       | 0.368 | 0.618 | 0.145 | 0.017 | 0.725 | 0.205 | 0.708 |
| PI | 0.010 | 0.008 | 0.023 | 0.029 | 0.007 | 0.009 | 0.024 | 0.009 |       | 0.405 | 0.004 | 0.008 | 0.185 | 0.051 | 0.318 |
| SC | 0.015 | 0.010 | 0.017 | 0.015 | 0.008 | 0.010 | 0.021 | 0.008 | 0.009 |       | 0.342 | 0.030 | 0.780 | 0.545 | 0.876 |
| TQ | 0.019 | 0.018 | 0.024 | 0.021 | 0.015 | 0.021 | 0.027 | 0.014 | 0.022 | 0.012 |       | 0.002 | 0.143 | 0.187 | 0.033 |
| TB | 0.018 | 0.008 | 0.017 | 0.021 | 0.011 | 0.011 | 0.020 | 0.016 | 0.016 | 0.016 | 0.023 |       | 0.169 | 0.093 | 0.101 |
| UR | 0.014 | 0.006 | 0.011 | 0.017 | 0.006 | 0.008 | 0.025 | 0.006 | 0.010 | 0.007 | 0.014 | 0.010 |       | 0.748 | 0.645 |
| VQ | 0.014 | 0.008 | 0.015 | 0.020 | 0.009 | 0.011 | 0.024 | 0.011 | 0.013 | 0.009 | 0.013 | 0.012 | 0.006 |       | 0.890 |
| VL | 0.012 | 0.010 | 0.020 | 0.021 | 0.008 | 0.009 | 0.027 | 0.007 | 0.009 | 0.006 | 0.018 | 0.012 | 0.007 | 0.006 |       |

S4 Table. Potential reductions in effective population size of *Aedes aegypti* from Rio de Janeiro were tested with the program BOTTLENECK (Luikart *et al.* 1999) using microsatellite datasets from three collections seasons (Wet 2011, Wet 2012, Dry 2013), assuming the two phase model of microsatellite evolution.

| locus  | wet 2011 |    |       |       |       | wet 2012 |       |     |    |       | dry 2013 |       |        |       |     |    |       |       |       |        |       |
|--------|----------|----|-------|-------|-------|----------|-------|-----|----|-------|----------|-------|--------|-------|-----|----|-------|-------|-------|--------|-------|
|        | n        | ko | He    | Heq   | S.D.  | DH/sd    | Prob  | n   | ko | He    | Heq      | S.D.  | DH/sd  | Prob  | n   | ko | He    | Heq   | S.D.  | DH/sd  | Prob  |
| AG5    | 812      | 8  | 0.738 | 0.667 | 0.102 | 0.696    | 0.278 | 206 | 7  | 0.729 | 0.671    | 0.104 | 0.566  | 0.333 | 202 | 7  | 0.728 | 0.674 | 0.101 | 0.529  | 0.346 |
| BbH08  | 802      | 3  | 0.646 | 0.308 | 0.186 | 1.818    | 0.009 | 204 | 3  | 0.638 | 0.353    | 0.177 | 1.614  | 0.021 | 202 | 3  | 0.66  | 0.357 | 0.174 | 1.74   | 0.007 |
| BbA10  | 792      | 8  | 0.585 | 0.673 | 0.104 | -0.838   | 0.165 | 206 | 6  | 0.683 | 0.623    | 0.118 | 0.504  | 0.368 | 202 | 8  | 0.746 | 0.71  | 0.087 | 0.414  | 0.406 |
| AC1    | 810      | 10 | 0.602 | 0.729 | 0.083 | -1.534   | 0.079 | 206 | 5  | 0.518 | 0.561    | 0.136 | -0.312 | 0.305 | 202 | 5  | 0.625 | 0.561 | 0.129 | 0.492  | 0.361 |
| M201   | 792      | 4  | 0.505 | 0.427 | 0.17  | 0.457    | 0.42  | 206 | 4  | 0.527 | 0.467    | 0.16  | 0.376  | 0.426 | 194 | 4  | 0.591 | 0.479 | 0.156 | 0.717  | 0.257 |
| 12ACG1 | 774      | 2  | 0.242 | 0.163 | 0.168 | 0.471    | 0.305 | 206 | 3  | 0.333 | 0.35     | 0.178 | -0.097 | 0.435 | 202 | 3  | 0.296 | 0.357 | 0.176 | -0.344 | 0.352 |
| 69TGA1 | 768      | 5  | 0.555 | 0.509 | 0.154 | 0.294    | 0.448 | 186 | 4  | 0.446 | 0.476    | 0.16  | -0.19  | 0.355 | 202 | 5  | 0.539 | 0.557 | 0.137 | -0.126 | 0.378 |
| BbB19  | 802      | 6  | 0.54  | 0.581 | 0.128 | -0.316   | 0.308 | 194 | 5  | 0.47  | 0.566    | 0.134 | -0.716 | 0.199 | 192 | 5  | 0.517 | 0.554 | 0.138 | -0.27  | 0.315 |

#### SIGN TEST

Assumptions: all loci fit T.P.M., mutation-drift equilibrium

Expected number of loci with heterozygosity excess: 4.44 (Wet 2011); 4.62 (Wet 2012); 4.63 (Dry 2013)

loci with heterozygosity deficiency: 3; 4; 3

loci with heterozygosity excess: 5; 4; 5

Probability: 0.49006; 0.45910; 0.54354

#### WILCOXON TEST

Probability (one tail for H deficiency): 0.67969 (Wet 2011); 0.76953 (Wet 2012); 0.98047 (Dry 2013)

Probability (one tail for H excess): 0.37109; 0.27344; 0.02734

#### MODE-SHIFT

0.0 0.1 0.2 0.3 0.4 0.5 0.6 0.7 0.8 0.9 1.0

| 0.565 | 0.152 | 0.065 | 0.022 | 0.065 | 0.043 | 0.065 | 0.000 | 0.022 | 0.000 | (Wet 2011)

| 0.486 | 0.189 | 0.054 | 0.054 | 0.054 | 0.027 | 0.054 | 0.027 | 0.000 | 0.000 | (Wet 2012);

| 0.475 | 0.200 | 0.050 | 0.050 | 0.125 | 0.025 | 0.050 | 0.000 | 0.025 | 0.000 | (Dry 2013)

normal L-shaped distribution for all three seasons.
