# Supplementary material for: Contrasting genetic structure between mitochondrial and nuclear markers in the dengue fever mosquito from Rio de Janeiro: implications for vector control
Source: PubMed Central journal article supplement (PMC4610386; doi:10.1111/eva.12301), 2015-09-07
Supplement: eva0008-0901-sd8.pdf [file eva0008-0901-sd8.pdf]

S1\_jModelTest2\_results\_for\_mtDNA.txt

----- jModeltest 2.1.7 v20150530 -----  
(c) 2011-onwards D. Darriba, G.L. Taboada, R. Doallo and D. Posada,  
(1) Department of Biochemistry, Genetics and Immunology  
University of Vigo, 36310 Vigo, Spain.  
(2) Department of Electronics and Systems  
University of A Coruna, 15071 A Coruna, Spain.  
e-mail: ddarriba@udc.es, dposada@uvigo.es  
-----

Thu Jun 25 08:17:28 AEST 2015  
Linux 3.2.0-76-virtual, arch: amd64, bits: 64, numcores: 16

jModelTest 2.1.7 v20150530  
Copyright (C) 2011 D. Darriba, G.L. Taboada, R. Doallo and D. Posada  
This program comes with ABSOLUTELY NO WARRANTY  
This is free software, and you are welcome to redistribute it under certain  
conditions

Notice: This program may contain errors. Please inspect results carefully.

-----  
Citation: Darriba D, Taboada GL, Doallo R and Posada D. 2012.  
"jModelTest 2: more models, new heuristics and parallel computing".  
Nature Methods 9(8), 772.  
-----

Reading data file "S1\_File\_relaxed\_phylip\_format\_mtSNPs.phy"... OK.  
number of sequences: 63  
number of sites: 92

-----  
\* \* \* \* \*  
\* COMPUTATION OF LIKELIHOOD SCORES WITH PHYML \*  
\* \* \* \* \*  
-----

::Settings::

Phyml version = 3.0  
Phyml binary = PhyML\_3.0\_linux64  
Phyml path = /usr/local/bin/jmodeltest-2.1.7/exe/phyml/  
Candidate models = 44  
number of substitution schemes = 11  
including models with equal/unequal base frequencies (+F)  
including only models without a proportion of invariable sites  
including models with/without rate variation among sites (+G) (nCat = 4)  
Optimized free parameters (K) = substitution parameters + 123 branch lengths +  
topology  
Base tree for likelihood calculations = ML tree  
Tree topology search operation = BEST

## S1\_jModelTest2\_results\_for\_mtDNA.txt

::Progress::

| Model    | Exec. Time   | Total Time   | -lnL     |
|----------|--------------|--------------|----------|
| JC+G     | 00h:00:54:00 | 00h:00:55:04 | 787.9410 |
| K80+G    | 00h:00:59:06 | 00h:01:01:01 | 717.4189 |
| TPM1+G   | 00h:00:58:05 | 00h:01:01:01 | 717.4185 |
| TrNef+G  | 00h:01:05:06 | 00h:01:08:01 | 716.6899 |
| F81+G    | 00h:01:07:03 | 00h:01:08:06 | 783.6567 |
| TPM2+G   | 00h:01:10:02 | 00h:01:12:05 | 717.3468 |
| TPM1uf+G | 00h:01:15:03 | 00h:01:17:00 | 709.2155 |
| TPM2uf+G | 00h:01:15:05 | 00h:01:17:00 | 709.2632 |
| TrN+G    | 00h:01:16:09 | 00h:01:19:02 | 709.2498 |
| HKY+G    | 00h:01:18:05 | 00h:01:20:07 | 709.2660 |
| GTR+G    | 00h:01:19:02 | 00h:01:21:01 | 708.7285 |
| TVM+G    | 00h:01:19:08 | 00h:01:21:04 | 708.7379 |
| TIM1+G   | 00h:01:19:04 | 00h:01:21:06 | 709.2020 |
| TIM2+G   | 00h:01:23:00 | 00h:01:25:00 | 709.2499 |
| TPM3uf+G | 00h:01:25:02 | 00h:01:26:06 | 708.8918 |
| TIM3+G   | 00h:01:26:07 | 00h:01:28:07 | 708.8822 |
| HKY      | 00h:00:21:05 | 00h:01:38:06 | 709.2666 |
| F81      | 00h:00:21:09 | 00h:01:38:09 | 783.7626 |
| TPM1uf   | 00h:00:21:01 | 00h:01:41:09 | 709.2122 |
| TrN      | 00h:00:23:05 | 00h:01:42:08 | 709.2481 |
| TPM3uf   | 00h:00:22:00 | 00h:01:43:04 | 708.8916 |
| TPM2uf   | 00h:00:22:06 | 00h:01:43:07 | 709.2637 |
| TIM1     | 00h:00:24:01 | 00h:01:45:07 | 709.1974 |
| TIM2     | 00h:00:22:03 | 00h:01:47:03 | 709.2502 |
| TIM3     | 00h:00:22:08 | 00h:01:49:04 | 708.8837 |
| TVM      | 00h:00:21:09 | 00h:01:50:06 | 708.7383 |
| TPM3+G   | 00h:00:58:09 | 00h:01:54:03 | 716.6482 |
| JC       | 00h:00:19:03 | 00h:01:58:02 | 788.0534 |
| K80      | 00h:00:19:06 | 00h:02:01:05 | 717.4183 |
| TIM2ef+G | 00h:01:01:01 | 00h:02:02:02 | 716.6145 |
| TPM1     | 00h:00:20:03 | 00h:02:03:07 | 717.4256 |
| GTR      | 00h:00:26:02 | 00h:02:04:08 | 708.7288 |
| TIM1ef+G | 00h:01:03:07 | 00h:02:04:09 | 716.6895 |
| TrNef    | 00h:00:22:02 | 00h:02:05:00 | 716.6959 |
| TPM2     | 00h:00:22:05 | 00h:02:06:02 | 717.3541 |
| TPM3     | 00h:00:20:09 | 00h:02:06:06 | 716.6111 |
| TVMef+G  | 00h:00:58:08 | 00h:02:07:04 | 716.4471 |
| TIM1ef   | 00h:00:20:05 | 00h:02:07:09 | 716.6955 |
| TIM2ef   | 00h:00:20:07 | 00h:02:10:01 | 716.6205 |
| TIM3ef+G | 00h:01:02:03 | 00h:02:10:04 | 715.8251 |
| TIM3ef   | 00h:00:20:00 | 00h:02:10:06 | 715.8311 |
| TVMef    | 00h:00:18:00 | 00h:02:12:03 | 716.4454 |
| SYM+G    | 00h:00:59:09 | 00h:02:12:04 | 715.6230 |
| SYM      | 00h:00:18:00 | 00h:02:16:03 | 715.6226 |

::Results::

S1\_jModelTest2\_results\_for\_mtDNA.txt

Model = JC  
partition = 000000  
-lnL = 788.0534  
K = 124

Model = JC+G  
partition = 000000  
-lnL = 787.9410  
K = 125  
gamma shape = 15351.2710

Model = F81  
partition = 000000  
-lnL = 783.7626  
K = 127  
freqA = 0.2360  
freqC = 0.2407  
freqG = 0.1901  
freqT = 0.3332

Model = F81+G  
partition = 000000  
-lnL = 783.6567  
K = 128  
freqA = 0.2359  
freqC = 0.2407  
freqG = 0.1901  
freqT = 0.3333  
gamma shape = 15351.2710

Model = K80  
partition = 010010  
-lnL = 717.4183  
K = 125  
kappa = 14.0552 (ti/tv = 7.0276)

Model = K80+G  
partition = 010010  
-lnL = 717.4189  
K = 126  
kappa = 14.0550 (ti/tv = 7.0275)  
gamma shape = 15351.2710

Model = HKY  
partition = 010010  
-lnL = 709.2666  
K = 128  
freqA = 0.2603  
freqC = 0.2057  
freqG = 0.1735  
freqT = 0.3605  
kappa = 15.2030 (ti/tv = 7.3851)

S1\_jModelTest2\_results\_for\_mtDNA.txt

Model = HKY+G  
partition = 010010  
-lnL = 709.2660  
K = 129  
freqA = 0.2603  
freqC = 0.2057  
freqG = 0.1735  
freqT = 0.3606  
kappa = 15.2082 (ti/tv = 7.3877)  
gamma shape = 15185.0220

Model = TrNef  
partition = 010020  
-lnL = 716.6959  
K = 126  
R(a) [AC] = 1.0000  
R(b) [AG] = 12.2219  
R(c) [AT] = 1.0000  
R(d) [CG] = 1.0000  
R(e) [CT] = 15.6453  
R(f) [GT] = 1.0000

Model = TrNef+G  
partition = 010020  
-lnL = 716.6899  
K = 127  
R(a) [AC] = 1.0000  
R(b) [AG] = 12.2255  
R(c) [AT] = 1.0000  
R(d) [CG] = 1.0000  
R(e) [CT] = 15.6530  
R(f) [GT] = 1.0000  
gamma shape = 15351.2710

Model = TrN  
partition = 010020  
-lnL = 709.2481  
K = 129  
freqA = 0.2631  
freqC = 0.2032  
freqG = 0.1762  
freqT = 0.3575  
R(a) [AC] = 1.0000  
R(b) [AG] = 14.8029  
R(c) [AT] = 1.0000  
R(d) [CG] = 1.0000  
R(e) [CT] = 15.5549  
R(f) [GT] = 1.0000

Model = TrN+G  
partition = 010020

S1\_jModelTest2\_results\_for\_mtDNA.txt

-lnL = 709.2498  
K = 130  
freqA = 0.2631  
freqC = 0.2032  
freqG = 0.1761  
freqT = 0.3576  
R(a) [AC] = 1.0000  
R(b) [AG] = 14.8029  
R(c) [AT] = 1.0000  
R(d) [CG] = 1.0000  
R(e) [CT] = 15.5358  
R(f) [GT] = 1.0000  
gamma shape = 15185.0220

Model = TPM1  
partition = 012210  
-lnL = 717.4256  
K = 126  
R(a) [AC] = 1.0000  
R(b) [AG] = 13.9537  
R(c) [AT] = 0.9858  
R(d) [CG] = 0.9858  
R(e) [CT] = 13.9537  
R(f) [GT] = 1.0000

Model = TPM1+G  
partition = 012210  
-lnL = 717.4185  
K = 127  
R(a) [AC] = 1.0000  
R(b) [AG] = 13.9546  
R(c) [AT] = 0.9857  
R(d) [CG] = 0.9857  
R(e) [CT] = 13.9546  
R(f) [GT] = 1.0000  
gamma shape = 15351.2710

Model = TPM1uf  
partition = 012210  
-lnL = 709.2121  
K = 129  
freqA = 0.2608  
freqC = 0.2053  
freqG = 0.1730  
freqT = 0.3609  
R(a) [AC] = 1.0000  
R(b) [AG] = 13.9426  
R(c) [AT] = 0.8444  
R(d) [CG] = 0.8444  
R(e) [CT] = 13.9426  
R(f) [GT] = 1.0000

S1\_jModelTest2\_results\_for\_mtDNA.txt

Model = TPM1uf+G  
partition = 012210  
-lnL = 709.2155  
K = 130  
freqA = 0.2608  
freqC = 0.2053  
freqG = 0.1730  
freqT = 0.3609  
R(a) [AC] = 1.0000  
R(b) [AG] = 13.9412  
R(c) [AT] = 0.8443  
R(d) [CG] = 0.8443  
R(e) [CT] = 13.9412  
R(f) [GT] = 1.0000  
gamma shape = 15185.0220

Model = TPM2  
partition = 010212  
-lnL = 717.3541  
K = 126  
R(a) [AC] = 1.2215  
R(b) [AG] = 15.8208  
R(c) [AT] = 1.2215  
R(d) [CG] = 1.0000  
R(e) [CT] = 15.8208  
R(f) [GT] = 1.0000

Model = TPM2+G  
partition = 010212  
-lnL = 717.3468  
K = 127  
R(a) [AC] = 1.2217  
R(b) [AG] = 15.8229  
R(c) [AT] = 1.2217  
R(d) [CG] = 1.0000  
R(e) [CT] = 15.8229  
R(f) [GT] = 1.0000  
gamma shape = 15351.2710

Model = TPM2uf  
partition = 010212  
-lnL = 709.2637  
K = 129  
freqA = 0.2606  
freqC = 0.2056  
freqG = 0.1732  
freqT = 0.3605  
R(a) [AC] = 0.9607  
R(b) [AG] = 14.8347  
R(c) [AT] = 0.9607  
R(d) [CG] = 1.0000  
R(e) [CT] = 14.8347

S1\_jModelTest2\_results\_for\_mtDNA.txt

R(f) [GT] = 1.0000

Model = TPM2uf+G  
partition = 010212  
-lnL = 709.2632  
K = 130  
freqA = 0.2606  
freqC = 0.2057  
freqG = 0.1732  
freqT = 0.3606  
R(a) [AC] = 0.9597  
R(b) [AG] = 14.8280  
R(c) [AT] = 0.9597  
R(d) [CG] = 1.0000  
R(e) [CT] = 14.8280  
R(f) [GT] = 1.0000  
gamma shape = 15185.0220

Model = TPM3  
partition = 012012  
-lnL = 716.6111  
K = 126  
R(a) [AC] = 0.4362  
R(b) [AG] = 9.7769  
R(c) [AT] = 1.0000  
R(d) [CG] = 0.4362  
R(e) [CT] = 9.7769  
R(f) [GT] = 1.0000

Model = TPM3+G  
partition = 012012  
-lnL = 716.6482  
K = 127  
R(a) [AC] = 0.4361  
R(b) [AG] = 9.7706  
R(c) [AT] = 1.0000  
R(d) [CG] = 0.4361  
R(e) [CT] = 9.7706  
R(f) [GT] = 1.0000  
gamma shape = 15185.0220

Model = TPM3uf  
partition = 012012  
-lnL = 708.8916  
K = 129  
freqA = 0.2603  
freqC = 0.2092  
freqG = 0.1736  
freqT = 0.3569  
R(a) [AC] = 0.5991  
R(b) [AG] = 13.0358  
R(c) [AT] = 1.0000

S1\_jModelTest2\_results\_for\_mtDNA.txt

R(d) [CG] = 0.5991  
R(e) [CT] = 13.0358  
R(f) [GT] = 1.0000

Model = TPM3uf+G  
partition = 012012  
-lnL = 708.8918  
K = 130  
freqA = 0.2603  
freqC = 0.2092  
freqG = 0.1736  
freqT = 0.3569  
R(a) [AC] = 0.5990  
R(b) [AG] = 13.0346  
R(c) [AT] = 1.0000  
R(d) [CG] = 0.5990  
R(e) [CT] = 13.0346  
R(f) [GT] = 1.0000  
gamma shape = 55386.6210

Model = TIM1ef  
partition = 012230  
-lnL = 716.6955  
K = 127  
R(a) [AC] = 1.0000  
R(b) [AG] = 12.1341  
R(c) [AT] = 0.9857  
R(d) [CG] = 0.9857  
R(e) [CT] = 15.5327  
R(f) [GT] = 1.0000

Model = TIM1ef+G  
partition = 012230  
-lnL = 716.6895  
K = 128  
R(a) [AC] = 1.0000  
R(b) [AG] = 12.1376  
R(c) [AT] = 0.9858  
R(d) [CG] = 0.9858  
R(e) [CT] = 15.5389  
R(f) [GT] = 1.0000  
gamma shape = 15351.2710

Model = TIM1  
partition = 012230  
-lnL = 709.1974  
K = 130  
freqA = 0.2636  
freqC = 0.2028  
freqG = 0.1757  
freqT = 0.3579  
R(a) [AC] = 1.0000



S1\_jModelTest2\_results\_for\_mtDNA.txt

R(b) [AG] = 13.5765  
R(c) [AT] = 0.8448  
R(d) [CG] = 0.8448  
R(e) [CT] = 14.2568  
R(f) [GT] = 1.0000

Model = TIM1+G  
partition = 012230  
-lnL = 709.2020  
K = 131  
freqA = 0.2635  
freqC = 0.2029  
freqG = 0.1756  
freqT = 0.3580  
R(a) [AC] = 1.0000  
R(b) [AG] = 13.5737  
R(c) [AT] = 0.8448  
R(d) [CG] = 0.8448  
R(e) [CT] = 14.2399  
R(f) [GT] = 1.0000  
gamma shape = 15185.0220

Model = TIM2ef  
partition = 010232  
-lnL = 716.6205  
K = 127  
R(a) [AC] = 1.2262  
R(b) [AG] = 13.7913  
R(c) [AT] = 1.2262  
R(d) [CG] = 1.0000  
R(e) [CT] = 17.6611  
R(f) [GT] = 1.0000

Model = TIM2ef+G  
partition = 010232  
-lnL = 716.6145  
K = 128  
R(a) [AC] = 1.2264  
R(b) [AG] = 13.7931  
R(c) [AT] = 1.2264  
R(d) [CG] = 1.0000  
R(e) [CT] = 17.6671  
R(f) [GT] = 1.0000  
gamma shape = 15351.2710

Model = TIM2  
partition = 010232  
-lnL = 709.2502  
K = 130  
freqA = 0.2634  
freqC = 0.2032  
freqG = 0.1758

S1\_jModelTest2\_results\_for\_mtDNA.txt

freqT = 0.3576  
R(a) [AC] = 0.9639  
R(b) [AG] = 14.4752  
R(c) [AT] = 0.9639  
R(d) [CG] = 1.0000  
R(e) [CT] = 15.1897  
R(f) [GT] = 1.0000

Model = TIM2+G  
partition = 010232  
-lnL = 709.2499  
K = 131  
freqA = 0.2634  
freqC = 0.2032  
freqG = 0.1758  
freqT = 0.3576  
R(a) [AC] = 0.9636  
R(b) [AG] = 14.4759  
R(c) [AT] = 0.9636  
R(d) [CG] = 1.0000  
R(e) [CT] = 15.1849  
R(f) [GT] = 1.0000  
gamma shape = 15185.0220

Model = TIM3ef  
partition = 012032  
-lnL = 715.8311  
K = 127  
R(a) [AC] = 0.4715  
R(b) [AG] = 9.5906  
R(c) [AT] = 1.0000  
R(d) [CG] = 0.4715  
R(e) [CT] = 12.2824  
R(f) [GT] = 1.0000

Model = TIM3ef+G  
partition = 012032  
-lnL = 715.8251  
K = 128  
R(a) [AC] = 0.4715  
R(b) [AG] = 9.5902  
R(c) [AT] = 1.0000  
R(d) [CG] = 0.4715  
R(e) [CT] = 12.2846  
R(f) [GT] = 1.0000  
gamma shape = 15351.2710

Model = TIM3  
partition = 012032  
-lnL = 708.8837  
K = 130  
freqA = 0.2627

S1\_jModelTest2\_results\_for\_mtDNA.txt

freqC = 0.2071  
freqG = 0.1759  
freqT = 0.3544  
R(a) [AC] = 0.6008  
R(b) [AG] = 12.7497  
R(c) [AT] = 1.0000  
R(d) [CG] = 0.6008  
R(e) [CT] = 13.2857  
R(f) [GT] = 1.0000

Model = TIM3+G  
partition = 012032  
-lnL = 708.8822  
K = 131  
freqA = 0.2627  
freqC = 0.2070  
freqG = 0.1759  
freqT = 0.3544  
R(a) [AC] = 0.6002  
R(b) [AG] = 12.7424  
R(c) [AT] = 1.0000  
R(d) [CG] = 0.6002  
R(e) [CT] = 13.2868  
R(f) [GT] = 1.0000  
gamma shape = 55386.6210

Model = TVMef  
partition = 012314  
-lnL = 716.4454  
K = 128  
R(a) [AC] = 0.5888  
R(b) [AG] = 10.3346  
R(c) [AT] = 1.1017  
R(d) [CG] = 0.2906  
R(e) [CT] = 10.3346  
R(f) [GT] = 1.0000

Model = TVMef+G  
partition = 012314  
-lnL = 716.4471  
K = 129  
R(a) [AC] = 0.5889  
R(b) [AG] = 10.3339  
R(c) [AT] = 1.1010  
R(d) [CG] = 0.2907  
R(e) [CT] = 10.3339  
R(f) [GT] = 1.0000  
gamma shape = 15185.0220

Model = TVM  
partition = 012314  
-lnL = 708.7383

S1\_jModelTest2\_results\_for\_mtDNA.txt

K = 131  
freqA = 0.2607  
freqC = 0.2091  
freqG = 0.1733  
freqT = 0.3570  
R(a) [AC] = 0.6352  
R(b) [AG] = 11.5718  
R(c) [AT] = 0.8154  
R(d) [CG] = 0.3733  
R(e) [CT] = 11.5718  
R(f) [GT] = 1.0000

Model = TVM+G  
partition = 012314  
-lnL = 708.7379

K = 132  
freqA = 0.2607  
freqC = 0.2091  
freqG = 0.1732  
freqT = 0.3570  
R(a) [AC] = 0.6350  
R(b) [AG] = 11.5683  
R(c) [AT] = 0.8149  
R(d) [CG] = 0.3736  
R(e) [CT] = 11.5683  
R(f) [GT] = 1.0000  
gamma shape = 15185.0220

Model = SYM  
partition = 012345  
-lnL = 715.6226

K = 129  
R(a) [AC] = 0.6333  
R(b) [AG] = 10.0656  
R(c) [AT] = 1.0856  
R(d) [CG] = 0.3104  
R(e) [CT] = 12.8961  
R(f) [GT] = 1.0000

Model = SYM+G  
partition = 012345  
-lnL = 715.6230

K = 130  
R(a) [AC] = 0.6333  
R(b) [AG] = 10.0639  
R(c) [AT] = 1.0856  
R(d) [CG] = 0.3103  
R(e) [CT] = 12.8986  
R(f) [GT] = 1.0000  
gamma shape = 15351.2710

Model = GTR

S1\_jModelTest2\_results\_for\_mtDNA.txt

partition = 012345  
-lnL = 708.7288  
K = 132  
freqA = 0.2631  
freqC = 0.2069  
freqG = 0.1755  
freqT = 0.3545  
R(a) [AC] = 0.6384  
R(b) [AG] = 11.3356  
R(c) [AT] = 0.8169  
R(d) [CG] = 0.3742  
R(e) [CT] = 11.8064  
R(f) [GT] = 1.0000

Model = GTR+G  
partition = 012345  
-lnL = 708.7285  
K = 133  
freqA = 0.2630  
freqC = 0.2070  
freqG = 0.1754  
freqT = 0.3546  
R(a) [AC] = 0.6385  
R(b) [AG] = 11.3417  
R(c) [AT] = 0.8174  
R(d) [CG] = 0.3743  
R(e) [CT] = 11.8064  
R(f) [GT] = 1.0000  
gamma shape = 15185.0220

Computation of likelihood scores completed. It took 00h:02:18:01.

-----  
\* AKAIKE INFORMATION CRITERION (AIC) \*  
\* \* \*  
-----

Model selected:  
Model = HKY  
partition = 010010  
-lnL = 709.2666  
K = 128  
freqA = 0.2603  
freqC = 0.2057  
freqG = 0.1735  
freqT = 0.3605  
kappa = 15.2030 (ti/tv = 7.3851)

S1\_jModelTest2\_results\_for\_mtDNA.txt

Tree for the best AIC model =

(Vi23-4:0.00000001,Vi23-5:0.00000058,(Vi10-5:0.03561308,(Vi12-5:0.01307189,(Br53-1:0.00000001,((BrM21-1:0.00000051,(Br47-1:0.00000024,(BrM54-1:0.00000001,(BrM22-1:0.01037483,((Vi23-2:0.02266554,(Vi12-1:0.00000050,Vi23-1:0.01199993):0.00000125):0.02462101,((In521:0.01111465,(In501:0.02348288,(In526:0.00000001,(In535:0.01113005,In556:0.01173030):0.01123786):0.01059872):0.05953795):0.00000065,((Gv10-H-03:0.02257912,Gv10-C-02:0.00000062):0.01116350,((Gv10-B-06:0.00000001,(Gv10-C-01:0.01122578,(Gv10-A-01:0.00000001,((Gv10-A-10:0.01243267,(Gv10-B-03:0.01115861,Gv10-E-05:0.00000097):0.00000097):0.00000075,(Gv10-F-08:0.01127201,Gv10-B-02:0.01126435):0.00000067):0.01113747):0.00000060):0.00000069):0.02245354,(In501a:0.00000001,(Vi10-2:0.04716243,((In534:0.00000001,In553:0.01121676):0.01121676,(Vi10-3:0.02266601,Vi12-3:0.00000047):0.01117005):0.00000056):0.00000059):0.00000001):0.00000060):0.00000083):0.00967116):0.08682646):0.01467517):0.00000384):0.00000381):0.20885083,(((Gv10-A-08:0.00000151,Gv10-F-10:0.00000001):0.02393215,((Br32-1:0.00000047,((BrK55-1:0.00000093,(BrM48-2:0.01186974,(Br57-1:0.01194923,(Br22-1:0.00000001,(Br32-2:0.01185144,BrM59-1:0.02310690):0.00000062):0.00000062):0.00000063):0.00000058):0.01113786,(Br26-2:0.00000001,Br30-1:0.00000061):0.00000061):0.01119346):0.01145164,(BrM23-1:0.00489765,Br30-2:0.00000064):0.00606830):0.01079505):0.05289481,(Vi10-1:0.01188110,(BrM56-1:0.01216771,((BrM17-1:0.00000001,BrM45-1:0.03700713):0.01160172,(BrK11-1:0.00000001,(BrK47-1:0.01110008,(BrM02-1:0.01111694,(BrM51-1:0.01122866,((BrM31-1:0.01110008,(BrM55-1:0.00000001,(BrM60-3:0.00000001,(BrK02-1:0.00000047,BrM03-1:0.00000001):0.00000071):0.00000046):0.00000054):0.00000054,(Br48-1:0.00000001,(BrM26-1:0.01122867,(BrM11-1:0.00543080,Br22-2:0.01318413):0.00569500):0.00000064):0.00000001):0.00000057):0.00000069):0.00000060):0.01115710):0.00000060):0.00000087):0.02761076):0.04170545):0.07536507):0.09001970):0.04816843):0.01031336):0.02329206);

\* AIC MODEL SELECTION : Selection uncertainty

| Model    | -lnL      | K   | AIC         | delta    | weight   | cumWeight |
|----------|-----------|-----|-------------|----------|----------|-----------|
| HKY      | 709.26655 | 128 | 1674.533100 | 0.000000 | 0.222094 | 0.222094  |
| TPM3uf   | 708.89163 | 129 | 1675.783260 | 1.250160 | 0.118869 | 0.340963  |
| TPM1uf   | 709.21215 | 129 | 1676.424300 | 1.891200 | 0.086272 | 0.427235  |
| TrN      | 709.24809 | 129 | 1676.496180 | 1.963080 | 0.083226 | 0.510461  |
| TPM2uf   | 709.26369 | 129 | 1676.527380 | 1.994280 | 0.081938 | 0.592399  |
| HKY+G    | 709.26596 | 129 | 1676.531920 | 1.998820 | 0.081752 | 0.674151  |
| TIM3     | 708.88370 | 130 | 1677.767400 | 3.234300 | 0.044078 | 0.718229  |
| TPM3uf+G | 708.89184 | 130 | 1677.783680 | 3.250580 | 0.043720 | 0.761949  |
| TIM1     | 709.19738 | 130 | 1678.394760 | 3.861660 | 0.032210 | 0.794159  |
| TPM1uf+G | 709.21548 | 130 | 1678.430960 | 3.897860 | 0.031632 | 0.825791  |
| TrN+G    | 709.24979 | 130 | 1678.499580 | 3.966480 | 0.030565 | 0.856356  |
| TIM2     | 709.25024 | 130 | 1678.500480 | 3.967380 | 0.030551 | 0.886908  |
| TPM2uf+G | 709.26324 | 130 | 1678.526480 | 3.993380 | 0.030157 | 0.917065  |
| TVM      | 708.73832 | 131 | 1679.476640 | 4.943540 | 0.018753 | 0.935817  |
| TIM3+G   | 708.88216 | 131 | 1679.764320 | 5.231220 | 0.016240 | 0.952057  |
| TIM1+G   | 709.20200 | 131 | 1680.404000 | 5.870900 | 0.011795 | 0.963852  |
| TIM2+G   | 709.24994 | 131 | 1680.499880 | 5.966780 | 0.011243 | 0.975095  |
| GTR      | 708.72882 | 132 | 1681.457640 | 6.924540 | 0.006965 | 0.982059  |
| TVM+G    | 708.73787 | 132 | 1681.475740 | 6.942640 | 0.006902 | 0.988961  |

S1\_jModelTest2\_results\_for\_mtDNA.txt

|          |           |     |             |            |           |          |
|----------|-----------|-----|-------------|------------|-----------|----------|
| GTR+G    | 708.72848 | 133 | 1683.456960 | 8.923860   | 0.002563  | 0.991524 |
| K80      | 717.41834 | 125 | 1684.836680 | 10.303580  | 0.001286  | 0.992810 |
| TPM3     | 716.61110 | 126 | 1685.222200 | 10.689100  | 0.001060  | 0.993870 |
| TrNef    | 716.69590 | 126 | 1685.391800 | 10.858700  | 0.000974  | 0.994844 |
| TIM3ef   | 715.83111 | 127 | 1685.662220 | 11.129120  | 0.000851  | 0.995695 |
| TPM2     | 717.35409 | 126 | 1686.708180 | 12.175080  | 0.000504  | 0.996199 |
| K80+G    | 717.41890 | 126 | 1686.837800 | 12.304700  | 0.000473  | 0.996672 |
| TPM1     | 717.42561 | 126 | 1686.851220 | 12.318120  | 0.000470  | 0.997142 |
| TIM2ef   | 716.62053 | 127 | 1687.241060 | 12.707960  | 0.000386  | 0.997528 |
| TPM3+G   | 716.64816 | 127 | 1687.296320 | 12.763220  | 0.000376  | 0.997904 |
| TrNef+G  | 716.68991 | 127 | 1687.379820 | 12.846720  | 0.000361  | 0.998264 |
| TIM1ef   | 716.69553 | 127 | 1687.391060 | 12.857960  | 0.000358  | 0.998623 |
| TIM3ef+G | 715.82506 | 128 | 1687.650120 | 13.117020  | 0.000315  | 0.998938 |
| TPM2+G   | 717.34682 | 127 | 1688.693640 | 14.160540  | 0.000187  | 0.999125 |
| TPM1+G   | 717.41854 | 127 | 1688.837080 | 14.303980  | 0.000174  | 0.999299 |
| TVMef    | 716.44544 | 128 | 1688.890880 | 14.357780  | 0.000169  | 0.999468 |
| TIM2ef+G | 716.61454 | 128 | 1689.229080 | 14.695980  | 0.000143  | 0.999611 |
| SYM      | 715.62256 | 129 | 1689.245120 | 14.712020  | 0.000142  | 0.999753 |
| TIM1ef+G | 716.68954 | 128 | 1689.379080 | 14.845980  | 0.000133  | 0.999886 |
| TVMef+G  | 716.44711 | 129 | 1690.894220 | 16.361120  | 6.22e-005 | 0.999948 |
| SYM+G    | 715.62298 | 130 | 1691.245960 | 16.712860  | 5.22e-005 | 1.000000 |
| F81      | 783.76257 | 127 | 1821.525140 | 146.992040 | 2.68e-033 | 1.000000 |
| F81+G    | 783.65670 | 128 | 1823.313400 | 148.780300 | 1.09e-033 | 1.000000 |
| JC       | 788.05344 | 124 | 1824.106880 | 149.573780 | 7.36e-034 | 1.000000 |
| JC+G     | 787.94097 | 125 | 1825.881940 | 151.348840 | 3.03e-034 | 1.000000 |

-----  
 -lnL: negative log likelihood  
 K: number of estimated parameters  
 AIC: Akaike Information Criterion  
 delta: AIC difference  
 weight: AIC weight  
 cumWeight: cumulative AIC weight

Model selection results also available at the "Model > Show model table" menu

\* AIC MODEL SELECTION : Confidence interval

There are 44 models in the 100% confidence interval: [ HKY TPM3uf TPM1uf TrN  
 TPM2uf HKY+G TIM3 TPM3uf+G TIM1 TPM1uf+G TrN+G TIM2 TPM2uf+G TVM TIM3+G TIM1+G  
 TIM2+G GTR TVM+G GTR+G K80 TPM3 TrNef TIM3ef TPM2 K80+G TPM1 TIM2ef TPM3+G  
 TrNef+G TIM1ef TIM3ef+G TPM2+G TPM1+G TVMef TIM2ef+G SYM TIM1ef+G TVMef+G SYM+G  
 F81 F81+G JC JC+G ]

\* AIC MODEL SELECTION : Parameter importance

| Parameter | Importance |
|-----------|------------|
| fA        | 0.9915     |
| fC        | 0.9915     |
| fG        | 0.9915     |

S1\_jModelTest2\_results\_for\_mtDNA.txt

|          |        |
|----------|--------|
| fT       | 0.9915 |
| kappa    | 0.3056 |
| titv     | 0.3056 |
| rAC      | 0.4162 |
| rAG      | 0.6944 |
| rAT      | 0.3538 |
| rCG      | 0.4242 |
| rCT      | 0.6944 |
| rGT      | 0.6944 |
| alpha(G) | 0.2688 |

-----  
 Values have been rounded.  
 (I): considers only +I models.  
 (G): considers only +G models.  
 (IG): considers only +I+G models.

\* AIC MODEL SELECTION : Model averaged estimates

| Parameter | Model-averaged estimates |
|-----------|--------------------------|
| fA        | 0.2612                   |
| fC        | 0.2059                   |
| fG        | 0.1741                   |
| fT        | 0.3589                   |
| kappa     | 15.1978                  |
| titv      | 7.3838                   |
| rAC       | 0.7373                   |
| rAG       | 13.7755                  |
| rAT       | 0.8945                   |
| rCG       | 0.6741                   |
| rCT       | 14.0541                  |
| rGT       | 1.0000                   |
| alpha(G)  | 24152.3614               |

-----  
 Numbers have been rounded.  
 (I): considers only +I models.  
 (G): considers only +G models.  
 (IG): considers only +I+G models.

\* AIC MODEL SELECTION : Best Model's command line

phym1 -i /tmp/jmodeltest6250482485722261938.phy -d nt -n 1 -b 0 --run\_id HKY -m 010010 -f m -c 1 --no\_memory\_check -o tlr -s BEST

-----  
 \* AKAIKE INFORMATION CRITERION (AIC) \*



S1\_jModelTest2\_results\_for\_mtDNA.txt

\*

\*

-----  
 Model selected:

Model = HKY  
 partition = 010010  
 -lnL = 709.2666  
 K = 128  
 freqA = 0.2603  
 freqC = 0.2057  
 freqG = 0.1735  
 freqT = 0.3605  
 kappa = 15.2030 (ti/tv = 7.3851)

Tree for the best AIC model =

(Vi23-4:0.00000001,Vi23-5:0.00000058,(Vi10-5:0.03561308,(Vi12-5:0.01307189,(Br53-1:0.00000001,((BrM21-1:0.00000051,(Br47-1:0.00000024,(BrM54-1:0.00000001,(BrM22-1:0.01037483,((Vi23-2:0.02266554,(Vi12-1:0.00000050,Vi23-1:0.01199993):0.00000125):0.02462101,((In521:0.01111465,(In501:0.02348288,(In526:0.00000001,(In535:0.01113005,In556:0.01173030):0.01123786):0.01059872):0.05953795):0.00000065,((Gv10-H-03:0.02257912,Gv10-C-02:0.00000062):0.01116350,((Gv10-B-06:0.00000001,(Gv10-C-01:0.01122578,(Gv10-A-01:0.00000001,((Gv10-A-10:0.01243267,(Gv10-B-03:0.01115861,Gv10-E-05:0.00000097):0.00000097):0.00000075,(Gv10-F-08:0.01127201,Gv10-B-02:0.01126435):0.00000067):0.01113747):0.00000060):0.00000069):0.02245354,(In501a:0.00000001,(Vi10-2:0.04716243,((In534:0.00000001,In553:0.01121676):0.01121676,(Vi10-3:0.02266601,Vi12-3:0.00000047):0.01117005):0.00000056):0.00000059):0.00000001):0.00000060):0.00000083):0.00967116):0.08682646):0.01467517):0.00000384):0.00000381):0.20885083,(((Gv10-A-08:0.00000151,Gv10-F-10:0.00000001):0.02393215,((Br32-1:0.00000047,((BrK55-1:0.00000093,(BrM48-2:0.01186974,(Br57-1:0.01194923,(Br22-1:0.00000001,(Br32-2:0.01185144,BrM59-1:0.02310690):0.00000062):0.00000062):0.00000063):0.00000058):0.01113786,(Br26-2:0.00000001,Br30-1:0.00000061):0.00000061):0.01119346):0.01145164,(BrM23-1:0.00489765,Br30-2:0.00000064):0.00606830):0.01079505):0.05289481,(Vi10-1:0.01188110,(BrM56-1:0.01216771,((BrM17-1:0.00000001,BrM45-1:0.03700713):0.01160172,(BrK11-1:0.00000001,(BrK47-1:0.01110008,(BrM02-1:0.01111694,(BrM51-1:0.01122866,((BrM31-1:0.01110008,(BrM55-1:0.00000001,(BrM60-3:0.00000001,(BrK02-1:0.00000047,BrM03-1:0.00000001):0.00000071):0.00000046):0.00000054):0.00000054,(Br48-1:0.00000001,(BrM26-1:0.01122867,(BrM11-1:0.00543080,Br22-2:0.01318413):0.00569500):0.00000064):0.00000001):0.00000057):0.00000069):0.00000060):0.01115710):0.00000060):0.00000087):0.02761076):0.04170545):0.07536507):0.09001970):0.04816843):0.01031336):0.02329206);

\* AIC MODEL SELECTION : Selection uncertainty

| Model  | -lnL      | K   | AIC         | delta    | weight   | cumWeight |
|--------|-----------|-----|-------------|----------|----------|-----------|
| HKY    | 709.26655 | 128 | 1674.533100 | 0.000000 | 0.222094 | 0.222094  |
| TPM3uf | 708.89163 | 129 | 1675.783260 | 1.250160 | 0.118869 | 0.340963  |
| TPM1uf | 709.21215 | 129 | 1676.424300 | 1.891200 | 0.086272 | 0.427235  |
| TrN    | 709.24809 | 129 | 1676.496180 | 1.963080 | 0.083226 | 0.510461  |
| TPM2uf | 709.26369 | 129 | 1676.527380 | 1.994280 | 0.081938 | 0.592399  |
| HKY+G  | 709.26596 | 129 | 1676.531920 | 1.998820 | 0.081752 | 0.674151  |

S1\_jModelTest2\_results\_for\_mtDNA.txt

|          |           |     |             |            |           |          |
|----------|-----------|-----|-------------|------------|-----------|----------|
| TIM3     | 708.88370 | 130 | 1677.767400 | 3.234300   | 0.044078  | 0.718229 |
| TPM3uf+G | 708.89184 | 130 | 1677.783680 | 3.250580   | 0.043720  | 0.761949 |
| TIM1     | 709.19738 | 130 | 1678.394760 | 3.861660   | 0.032210  | 0.794159 |
| TPM1uf+G | 709.21548 | 130 | 1678.430960 | 3.897860   | 0.031632  | 0.825791 |
| TrN+G    | 709.24979 | 130 | 1678.499580 | 3.966480   | 0.030565  | 0.856356 |
| TIM2     | 709.25024 | 130 | 1678.500480 | 3.967380   | 0.030551  | 0.886908 |
| TPM2uf+G | 709.26324 | 130 | 1678.526480 | 3.993380   | 0.030157  | 0.917065 |
| TVM      | 708.73832 | 131 | 1679.476640 | 4.943540   | 0.018753  | 0.935817 |
| TIM3+G   | 708.88216 | 131 | 1679.764320 | 5.231220   | 0.016240  | 0.952057 |
| TIM1+G   | 709.20200 | 131 | 1680.404000 | 5.870900   | 0.011795  | 0.963852 |
| TIM2+G   | 709.24994 | 131 | 1680.499880 | 5.966780   | 0.011243  | 0.975095 |
| GTR      | 708.72882 | 132 | 1681.457640 | 6.924540   | 0.006965  | 0.982059 |
| TVM+G    | 708.73787 | 132 | 1681.475740 | 6.942640   | 0.006902  | 0.988961 |
| GTR+G    | 708.72848 | 133 | 1683.456960 | 8.923860   | 0.002563  | 0.991524 |
| K80      | 717.41834 | 125 | 1684.836680 | 10.303580  | 0.001286  | 0.992810 |
| TPM3     | 716.61110 | 126 | 1685.222200 | 10.689100  | 0.001060  | 0.993870 |
| TrNef    | 716.69590 | 126 | 1685.391800 | 10.858700  | 0.000974  | 0.994844 |
| TIM3ef   | 715.83111 | 127 | 1685.662220 | 11.129120  | 0.000851  | 0.995695 |
| TPM2     | 717.35409 | 126 | 1686.708180 | 12.175080  | 0.000504  | 0.996199 |
| K80+G    | 717.41890 | 126 | 1686.837800 | 12.304700  | 0.000473  | 0.996672 |
| TPM1     | 717.42561 | 126 | 1686.851220 | 12.318120  | 0.000470  | 0.997142 |
| TIM2ef   | 716.62053 | 127 | 1687.241060 | 12.707960  | 0.000386  | 0.997528 |
| TPM3+G   | 716.64816 | 127 | 1687.296320 | 12.763220  | 0.000376  | 0.997904 |
| TrNef+G  | 716.68991 | 127 | 1687.379820 | 12.846720  | 0.000361  | 0.998264 |
| TIM1ef   | 716.69553 | 127 | 1687.391060 | 12.857960  | 0.000358  | 0.998623 |
| TIM3ef+G | 715.82506 | 128 | 1687.650120 | 13.117020  | 0.000315  | 0.998938 |
| TPM2+G   | 717.34682 | 127 | 1688.693640 | 14.160540  | 0.000187  | 0.999125 |
| TPM1+G   | 717.41854 | 127 | 1688.837080 | 14.303980  | 0.000174  | 0.999299 |
| TVMef    | 716.44544 | 128 | 1688.890880 | 14.357780  | 0.000169  | 0.999468 |
| TIM2ef+G | 716.61454 | 128 | 1689.229080 | 14.695980  | 0.000143  | 0.999611 |
| SYM      | 715.62256 | 129 | 1689.245120 | 14.712020  | 0.000142  | 0.999753 |
| TIM1ef+G | 716.68954 | 128 | 1689.379080 | 14.845980  | 0.000133  | 0.999886 |
| TVMef+G  | 716.44711 | 129 | 1690.894220 | 16.361120  | 6.22e-005 | 0.999948 |
| SYM+G    | 715.62298 | 130 | 1691.245960 | 16.712860  | 5.22e-005 | 1.000000 |
| F81      | 783.76257 | 127 | 1821.525140 | 146.992040 | 2.68e-033 | 1.000000 |
| F81+G    | 783.65670 | 128 | 1823.313400 | 148.780300 | 1.09e-033 | 1.000000 |
| JC       | 788.05344 | 124 | 1824.106880 | 149.573780 | 7.36e-034 | 1.000000 |
| JC+G     | 787.94097 | 125 | 1825.881940 | 151.348840 | 3.03e-034 | 1.000000 |

-----  
 -lnL: negative log likelihood  
 K: number of estimated parameters  
 AIC: Akaike Information Criterion  
 delta: AIC difference  
 weight: AIC weight  
 cumWeight: cumulative AIC weight

Model selection results also available at the "Model > Show model table" menu

\* AIC MODEL SELECTION : Confidence interval

There are 14 models in the 95% confidence interval: [ HKY TPM3uf TPM1uf TrN

S1\_jModelTest2\_results\_for\_mtDNA.txt

TPM2uf HKY+G TIM3 TPM3uf+G TIM1 TPM1uf+G TrN+G TIM2 TPM2uf+G TVM ]

\* AIC MODEL SELECTION : Parameter importance

| Parameter | Importance |
|-----------|------------|
| fA        | 1.0000     |
| fC        | 1.0000     |
| fG        | 1.0000     |
| fT        | 1.0000     |
| kappa     | 0.3247     |
| titv      | 0.3247     |
| rAC       | 0.3933     |
| rAG       | 0.6753     |
| rAT       | 0.3329     |
| rCG       | 0.4013     |
| rCT       | 0.6753     |
| rGT       | 0.6753     |
| alpha(G)  | 0.2328     |

Values have been rounded.

- (I): considers only +I models.
- (G): considers only +G models.
- (IG): considers only +I+G models.

\* AIC MODEL SELECTION : Model averaged estimates

| Parameter | Model-averaged estimates |
|-----------|--------------------------|
| fA        | 0.2611                   |
| fC        | 0.2059                   |
| fG        | 0.1740                   |
| fT        | 0.3590                   |
| kappa     | 15.2044                  |
| titv      | 7.3858                   |
| rAC       | 0.7414                   |
| rAG       | 13.8755                  |
| rAT       | 0.8961                   |
| rCG       | 0.6861                   |
| rCT       | 14.1166                  |
| rGT       | 1.0000                   |
| alpha(G)  | 23253.9422               |

Numbers have been rounded.

- (I): considers only +I models.
- (G): considers only +G models.
- (IG): considers only +I+G models.

S1\_jModelTest2\_results\_for\_mtDNA.txt

\* AIC MODEL SELECTION : Best Model's command line

phym1 -i /tmp/jmodeltest6250482485722261938.phy -d nt -n 1 -b 0 --run\_id HKY -m 010010 -f m -c 1 --no\_memory\_check -o tlr -s BEST

```
-----  
*                                     *  
*                               MODEL AVERAGED PHYLOGENY                               *  
*                                     *  
-----
```

Selection criterion: . . . . AIC  
Confidence interval: . . . . 0.95  
Consensus type: . . . . . 50% majority rule

Using 15 models in the 0.95 confidence interval = HKY TPM3uf TPM1uf TrN TPM2uf  
HKY+G TIM3 TPM3uf+G TIM1 TPM1uf+G TrN+G TIM2 TPM2uf+G TVM TIM3+G

Species in order:

1. Vi23-4
2. Vi23-5
3. Vi10-5
4. Vi12-5
5. Br53-1
6. BrM21-1
7. Br47-1
8. BrM54-1
9. BrM22-1
10. Vi23-2
11. Vi12-1
12. Vi23-1
13. In521
14. In501
15. In526
16. In535
17. In556
18. Gv10-H-03
19. Gv10-C-02
20. Gv10-B-06
21. Gv10-C-01
22. Gv10-A-01
23. Gv10-A-10
24. Gv10-B-03
25. Gv10-E-05
26. Gv10-F-08
27. Gv10-B-02
28. In501a
29. Vi10-2

S1\_jModelTest2\_results\_for\_mtDNA.txt

- 30. In534
- 31. In553
- 32. Vi10-3
- 33. Vi12-3
- 34. Gv10-A-08
- 35. Gv10-F-10
- 36. Br32-1
- 37. BrK55-1
- 38. BrM48-2
- 39. Br57-1
- 40. Br22-1
- 41. Br32-2
- 42. BrM59-1
- 43. Br26-2
- 44. Br30-1
- 45. BrM23-1
- 46. Br30-2
- 47. Vi10-1
- 48. BrM56-1
- 49. BrM17-1
- 50. BrM45-1
- 51. BrK11-1
- 52. BrK47-1
- 53. BrM02-1
- 54. BrM51-1
- 55. BrM31-1
- 56. BrM55-1
- 57. BrM60-3
- 58. BrK02-1
- 59. BrM03-1
- 60. Br48-1
- 61. BrM26-1
- 62. BrM11-1
- 63. Br22-2

Bipartitions included in the consensus tree

```
12345678911111111111222222222233333333334444444444555555555566666
0123456789012345678901234567890123456789012345678901234567890123
***** ( 1.0 )
_***** ( 1.0 )
_ _***** ( 1.0 )
_ _ _***** ( 1.0 )
_ _ _ _***** ( 1.0 )
_ _ _ _ _***** ( 1.0 )
_ _ _ _ _***** ( 1.0 )
_ _ _ _ _***** ( 1.0 )
_ _ _ _ _***** ( 0.5682 )
_ _ _ _ _***** ( 0.51682 )
_ _ _ _ _***** ( 1.0 )
_ _ _ _ _***** ( 1.0 )
_ _ _ _ _** ( 1.0 )
_ _ _ _ _** ( 0.53695 )
_ _ _ _ _***** ( 1.0 )
```

S1\_jModelTest2\_results\_for\_mtDNA.txt

```

----- ***** ----- ( 1.0 )
----- *** ----- ( 1.0 )
----- ** ----- ( 1.0 )
----- ** ----- ( 1.0 )
----- ***** ----- ( 1.0 )
----- ***** ----- ( 0.69305 )
----- ***** ----- ( 0.76181 )
----- ***** ----- ( 1.0 )
----- *** ----- ( 0.50804 )
----- ** ----- ( 0.50804 )
----- ** ----- ( 0.50484 )
----- ***** ----- ( 0.72688 )
----- ** ----- ( 1.0 )
----- ** ----- ( 1.0 )
----- ***** ----- ( 1.0 )
----- ***** ----- ( 1.0 )
----- ** ----- ( 1.0 )
----- ***** ----- ( 1.0 )
----- ***** ----- ( 0.57078 )
----- ***** ----- ( 0.84665 )
----- ** ----- ( 0.57078 )
----- ***** ----- ( 1.0 )
----- ***** ----- ( 1.0 )
----- ***** ----- ( 1.0 )
----- ** ----- ( 1.0 )
----- ***** ----- ( 0.84923 )
----- ***** ----- ( 1.0 )
----- ***** ----- ( 0.91258 )
----- ***** ----- ( 0.91258 )
----- ***** ----- ( 1.0 )
----- ***** ----- ( 0.53868 )
----- ***** ----- ( 1.0 )
----- *** ----- ( 1.0 )
----- ** ----- ( 1.0 )
----- *- * ----- ( 0.54874 )

```

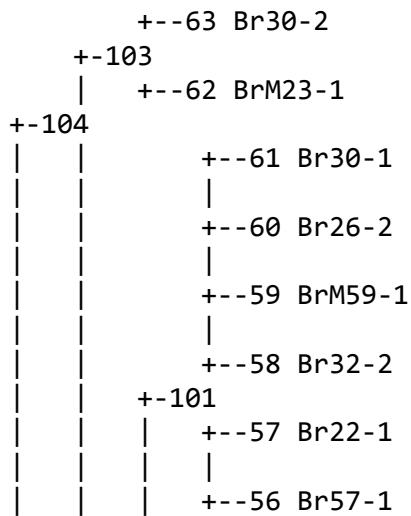

S1\_jModelTest2\_results\_for\_mtDNA.txt

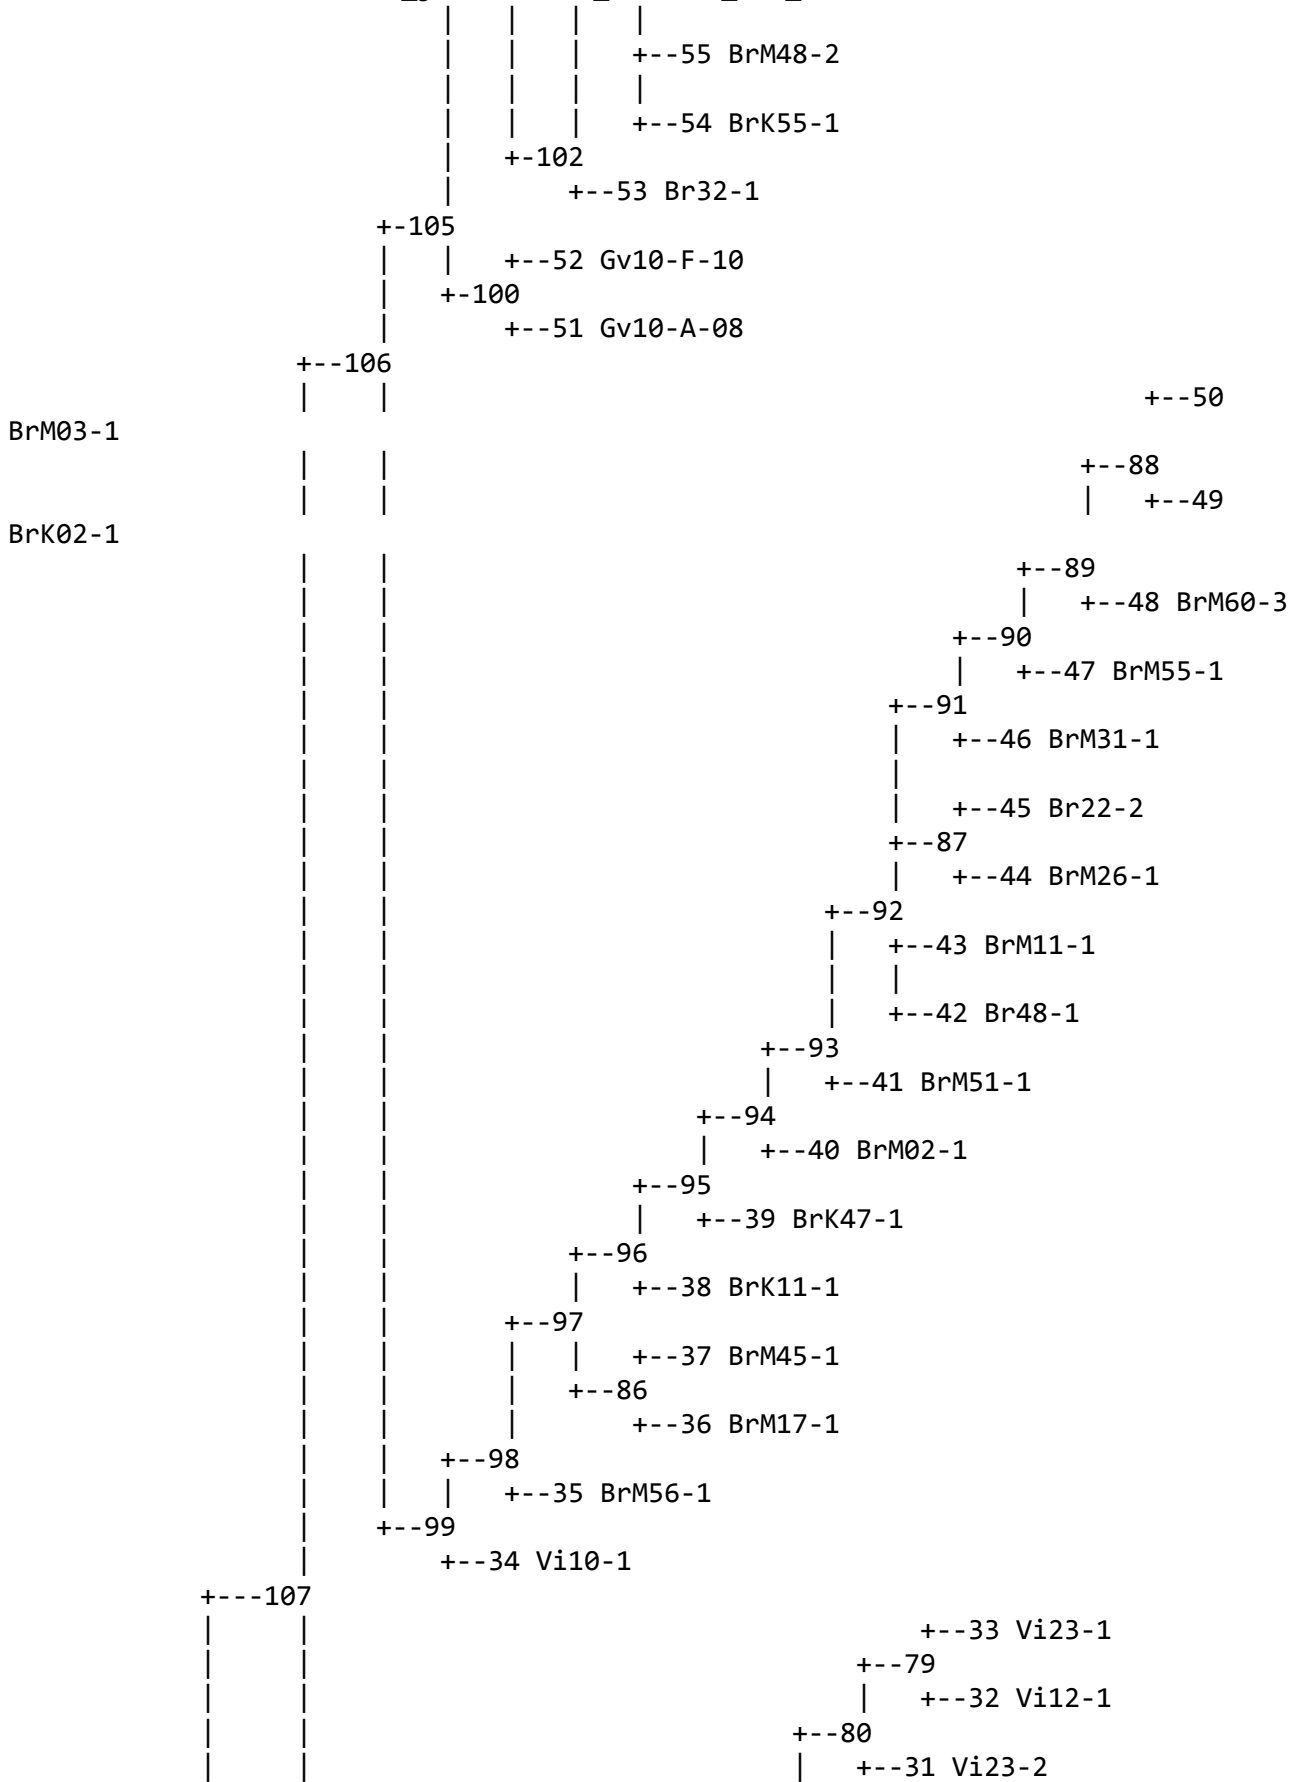

S1\_jModelTest2\_results\_for\_mtDNA.txt

```

      +---81
      |
      |   +---30 In553
      |   |   +---76
      |   |   |   +---29 In534
      |   |   |   |   +---77
      |   |   |   |   |   +---28 Vi12-3
      |   |   |   |   |   |   +---75
      |   |   |   |   |   |   |   +---27 Vi10-3
      |   |   |   |   |   |   |   |   +---26
      |   |   |   |   |   |   |   |   |   +---70
      |   |   |   |   |   |   |   |   |   |   +---25
      |   |   |   |   |   |   |   |   |   |   |   +---71
      |   |   |   |   |   |   |   |   |   |   |   |   +---68
      |   |   |   |   |   |   |   |   |   |   |   |   |   +---69
      |   |   |   |   |   |   |   |   |   |   |   |   |   |   +---22
      |   |   |   |   |   |   |   |   |   |   |   |   |   |   |   +---72
      |   |   |   |   |   |   |   |   |   |   |   |   |   |   |   |   +---21 Gv10-A-01
      |   |   |   |   |   |   |   |   |   |   |   |   |   |   |   |   |   +---73
      |   |   |   |   |   |   |   |   |   |   |   |   |   |   |   |   |   |   +---20 Gv10-C-01
      |   |   |   |   |   |   |   |   |   |   |   |   |   |   |   |   |   |   |   +---74
      |   |   |   |   |   |   |   |   |   |   |   |   |   |   |   |   |   |   |   +---19 Gv10-B-06
      |   |   |   |   |   |   |   |   |   |   |   |   |   |   |   |   |   |   |   |   +---18 In556
      |   |   |   |   |   |   |   |   |   |   |   |   |   |   |   |   |   |   |   |   +---65
      |   |   |   |   |   |   |   |   |   |   |   |   |   |   |   |   |   |   |   |   |   +---17 In535
      |   |   |   |   |   |   |   |   |   |   |   |   |   |   |   |   |   |   |   |   |   +---66
      |   |   |   |   |   |   |   |   |   |   |   |   |   |   |   |   |   |   |   |   |   |   +---16 In526
      |   |   |   |   |   |   |   |   |   |   |   |   |   |   |   |   |   |   |   |   |   |   |   +---67
      |   |   |   |   |   |   |   |   |   |   |   |   |   |   |   |   |   |   |   |   |   |   |   |   +---15 In501
      |   |   |   |   |   |   |   |   |   |   |   |   |   |   |   |   |   |   |   |   |   |   |   |   +---14 Gv10-C-02
      |   |   |   |   |   |   |   |   |   |   |   |   |   |   |   |   |   |   |   |   |   |   |   |   +---64
      |   |   |   |   |   |   |   |   |   |   |   |   |   |   |   |   |   |   |   |   |   |   |   |   |   +---13 Gv10-H-03
      |   |   |   |   |   |   |   |   |   |   |   |   |   |   |   |   |   |   |   |   |   |   |   |   |   |   +---78
      |   |   |   |   |   |   |   |   |   |   |   |   |   |   |   |   |   |   |   |   |   |   |   |   |   |   +---12 Vi10-2
      |   |   |   |   |   |   |   |   |   |   |   |   |   |   |   |   |   |   |   |   |   |   |   |   |   |   |   +---11 In501a
      |   |   |   |   |   |   |   |   |   |   |   |   |   |   |   |   |   |   |   |   |   |   |   |   |   |   |   |   +---10 In521
      |   |   |   |   |   |   |   |   |   |   |   |   |   |   |   |   |   |   |   |   |   |   |   |   |   |   |   +---82
      |   |   |   |   |   |   |   |   |   |   |   |   |   |   |   |   |   |   |   |   |   |   |   |   |   |   |   |   +---9 BrM22-1
      |   |   |   |   |   |   |   |   |   |   |   |   |   |   |   |   |   |   |   |   |   |   |   |   |   |   |   |   |   +---83
      |   |   |   |   |   |   |   |   |   |   |   |   |   |   |   |   |   |   |   |   |   |   |   |   |   |   |   |   |   |   +---8
      |   |   |   |   |   |   |   |   |   |   |   |   |   |   |   |   |   |   |   |   |   |   |   |   |   |   |   |   |   |   |   +---8 BrM54-1
      |   |   |   |   |   |   |   |   |   |   |   |   |   |   |   |   |   |   |   |   |   |   |   |   |   |   |   |   |   |   |   |   +---84
  
```



S1\_jModelTest2\_results\_for\_mtDNA.txt

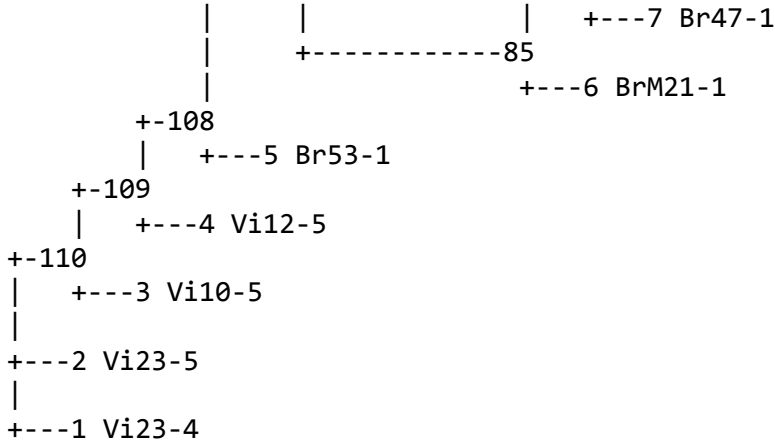

(Vi23-4:0.000000,Vi23-5:0.000001,(Vi10-5:0.035613,(Vi12-5:0.013070,(Br53-1:0.000000,((BrM21-1:0.000000,(Br47-1:0.000000,(BrM54-1:0.000000,(BrM22-1:0.010375,((In521:0.011115,In501a:0.000000,Vi10-2:0.047162,(Gv10-H-03:0.022579,Gv10-C-02:0.000001)1.00:0.011164,(In501:0.023483,(In526:0.000000,(In535:0.011130,In556:0.011730)1.00:0.011238)1.00:0.010599)1.00:0.059538,(Gv10-B-06:0.000000,(Gv10-C-01:0.011226,(Gv10-A-01:0.000000,((Gv10-A-10:0.012433,(Gv10-B-03:0.011159,Gv10-E-05:0.000001)0.51:0.000001),(Gv10-F-08:0.011272,Gv10-B-02:0.011264)0.50:0.000001)1.00:0.011137)0.76:0.000001)0.69:0.000001)1.00:0.022454,((Vi10-3:0.022666,Vi12-3:0.000000)1.00:0.011170,(In534:0.000000,In553:0.011215)1.00:0.011217)0.73:0.000001)1.00:0.009671,(Vi23-2:0.022666,(Vi12-1:0.000000,Vi23-1:0.012000)0.54:0.000001)1.00:0.024623)1.00:0.086828)1.00:0.014676)0.52:0.000004)0.57:0.000004)1.00:0.208851,((Vi10-1:0.011881,(BrM56-1:0.012168,((BrM17-1:0.000000,BrM45-1:0.037007)1.00:0.011602,(BrK11-1:0.000000,(BrK47-1:0.011100,(BrM02-1:0.011117,(BrM51-1:0.011229,(Br48-1:0.000000,BrM11-1:0.011094,(BrM26-1:0.010854,Br22-2:0.013204)0.55:0.000538,(BrM31-1:0.011100,(BrM55-1:0.000000,(BrM60-3:0.000000,(BrK02-1:0.000000,BrM03-1:0.000000)1.00:0.000001)1.00:0.000000)1.00:0.000001)0.54:0.000001)1.00:0.000001)0.91:0.000001)0.91:0.000001)1.00:0.011157)0.85:0.000001)1.00:0.000001)1.00:0.027611)1.00:0.041705,((Gv10-A-08:0.000002,Gv10-F-10:0.000000)1.00:0.023923,((Br32-1:0.000001,(BrK55-1:0.000001,BrM48-2:0.011867,Br57-1:0.011939,Br22-1:0.000000,Br32-2:0.011849,BrM59-1:0.023106,Br26-2:0.000000,Br30-1:0.000001)0.85:0.011188)0.57:0.011452,(BrM23-1:0.004903,Br30-2:0.000001)0.57:0.006068)1.00:0.010795)1.00:0.052903)1.00:0.075406)1.00:0.090020)1.00:0.048168)1.00:0.010313)1.00:0.023292);

Note: this tree is unrooted. Branch lengths are the expected number of substitutions per site. Labels next to parentheses represent phylogenetic uncertainty due to model selection (see documentation)

```

-----
*
*                               *
*                               *
*                               *
*                               *
*                               *
-----
  
```

Selection criterion: . . . . AIC  
 Confidence interval: . . . . 0.95

S1\_jModelTest2\_results\_for\_mtDNA.txt

Consensus type: . . . . . 50% majority rule

Using 15 models in the 0.95 confidence interval = HKY TPM3uf TPM1uf TrN TPM2uf  
HKY+G TIM3 TPM3uf+G TIM1 TPM1uf+G TrN+G TIM2 TPM2uf+G TVM TIM3+G

Species in order:

1. Vi23-4
2. Vi23-5
3. Vi10-5
4. Vi12-5
5. Br53-1
6. BrM21-1
7. Br47-1
8. BrM54-1
9. BrM22-1
10. Vi23-2
11. Vi12-1
12. Vi23-1
13. In521
14. In501
15. In526
16. In535
17. In556
18. Gv10-H-03
19. Gv10-C-02
20. Gv10-B-06
21. Gv10-C-01
22. Gv10-A-01
23. Gv10-A-10
24. Gv10-B-03
25. Gv10-E-05
26. Gv10-F-08
27. Gv10-B-02
28. In501a
29. Vi10-2
30. In534
31. In553
32. Vi10-3
33. Vi12-3
34. Gv10-A-08
35. Gv10-F-10
36. Br32-1
37. BrK55-1
38. BrM48-2
39. Br57-1
40. Br22-1
41. Br32-2
42. BrM59-1
43. Br26-2
44. Br30-1

S1\_jModelTest2\_results\_for\_mtDNA.txt

- 45. BrM23-1
- 46. Br30-2
- 47. Vi10-1
- 48. BrM56-1
- 49. BrM17-1
- 50. BrM45-1
- 51. BrK11-1
- 52. BrK47-1
- 53. BrM02-1
- 54. BrM51-1
- 55. BrM31-1
- 56. BrM55-1
- 57. BrM60-3
- 58. BrK02-1
- 59. BrM03-1
- 60. Br48-1
- 61. BrM26-1
- 62. BrM11-1
- 63. Br22-2

Bipartitions included in the consensus tree

```
12345678911111111111222222222233333333334444444444555555555566666
012345678901234567890123456789012345678901234567890123
***** ( 1.0 )
_***** ( 1.0 )
_ _***** ( 1.0 )
_ _ _***** ( 1.0 )
_ _ _ _***** ( 1.0 )
_ _ _ _ _***** ( 1.0 )
_ _ _ _ _*****_***** ( 1.0 )
_ _ _ _ _*****_***** ( 0.5682 )
_ _ _ _ _*****_***** ( 0.51682 )
_ _ _ _ _*****_***** ( 1.0 )
_ _ _ _ _*****_***** ( 1.0 )
_ _ _ _ _***_***** ( 1.0 )
_ _ _ _ _**_***** ( 0.53695 )
_ _ _ _ _*****_***** ( 1.0 )
_ _ _ _ _****_***** ( 1.0 )
_ _ _ _ _***_***** ( 1.0 )
_ _ _ _ _**_***** ( 1.0 )
_ _ _ _ _*_***** ( 1.0 )
_ _ _ _ _*****_***** ( 1.0 )
_ _ _ _ _*****_***** ( 0.69305 )
_ _ _ _ _*****_***** ( 0.76181 )
_ _ _ _ _*****_***** ( 1.0 )
_ _ _ _ _***_***** ( 0.50804 )
_ _ _ _ _**_***** ( 0.50804 )
_ _ _ _ _*_***** ( 0.50484 )
_ _ _ _ _****_***** ( 0.72688 )
_ _ _ _ _**_***** ( 1.0 )
_ _ _ _ _**_***** ( 1.0 )
_ _ _ _ _*****_***** ( 1.0 )
```

S1\_jModelTest2\_results\_for\_mtDNA.txt

```
-----*****----- ( 1.0 )
-----**----- ( 1.0 )
-----*****----- ( 1.0 )
-----*****----- ( 0.57078 )
-----*****----- ( 0.84665 )
-----**----- ( 0.57078 )
-----***** ( 1.0 )
-----***** ( 1.0 )
-----***** ( 1.0 )
-----**----- ( 1.0 )
-----***** ( 0.84923 )
-----***** ( 1.0 )
-----***** ( 0.91258 )
-----***** ( 0.91258 )
-----***** ( 1.0 )
-----***** ( 0.53868 )
-----**** ( 1.0 )
-----*** ( 1.0 )
-----** ( 1.0 )
-----*-* ( 0.54874 )
```

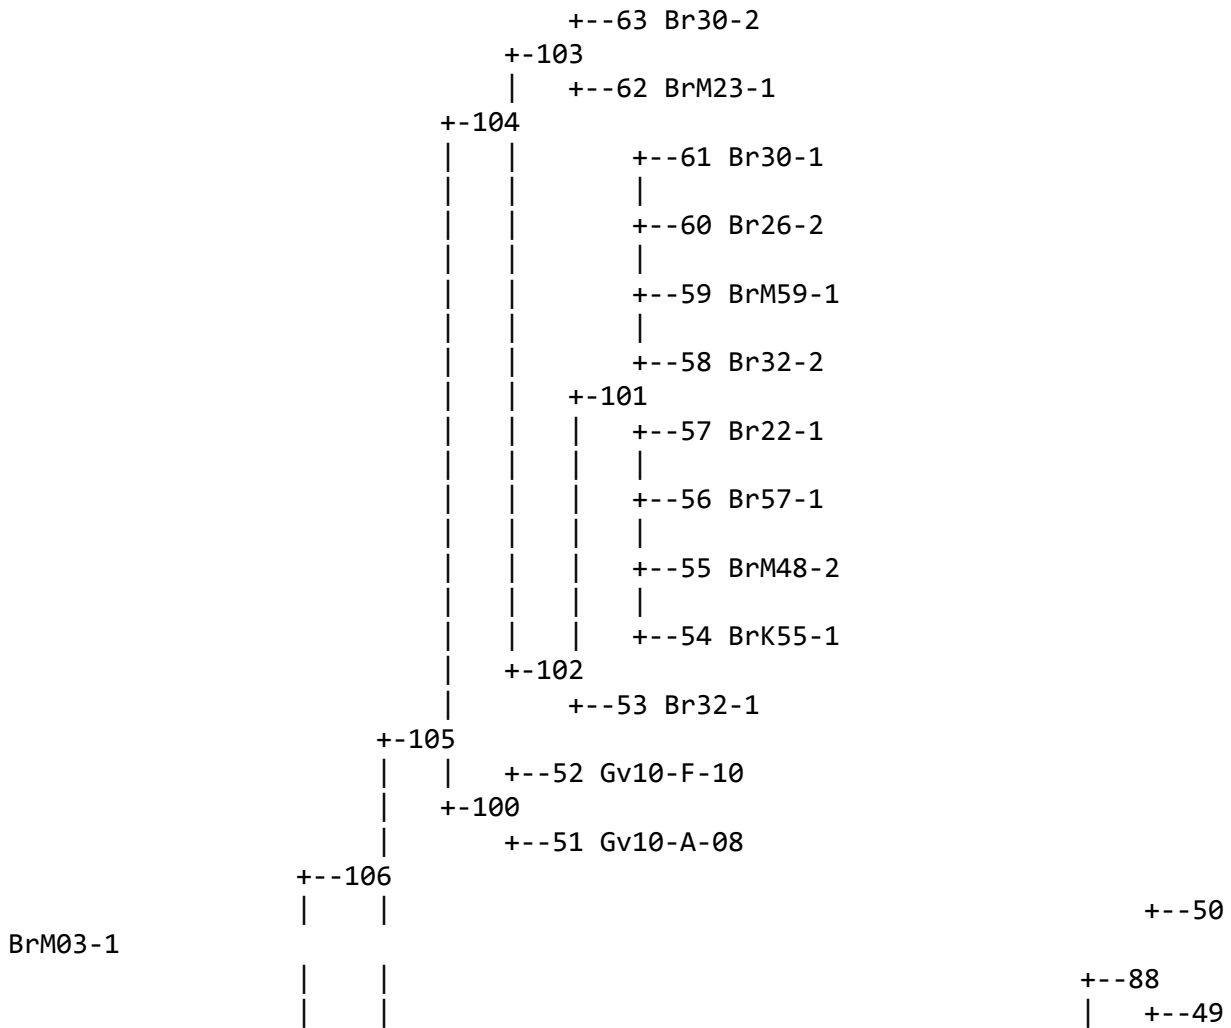

S1\_jModelTest2\_results\_for\_mtDNA.txt

BrK02-1

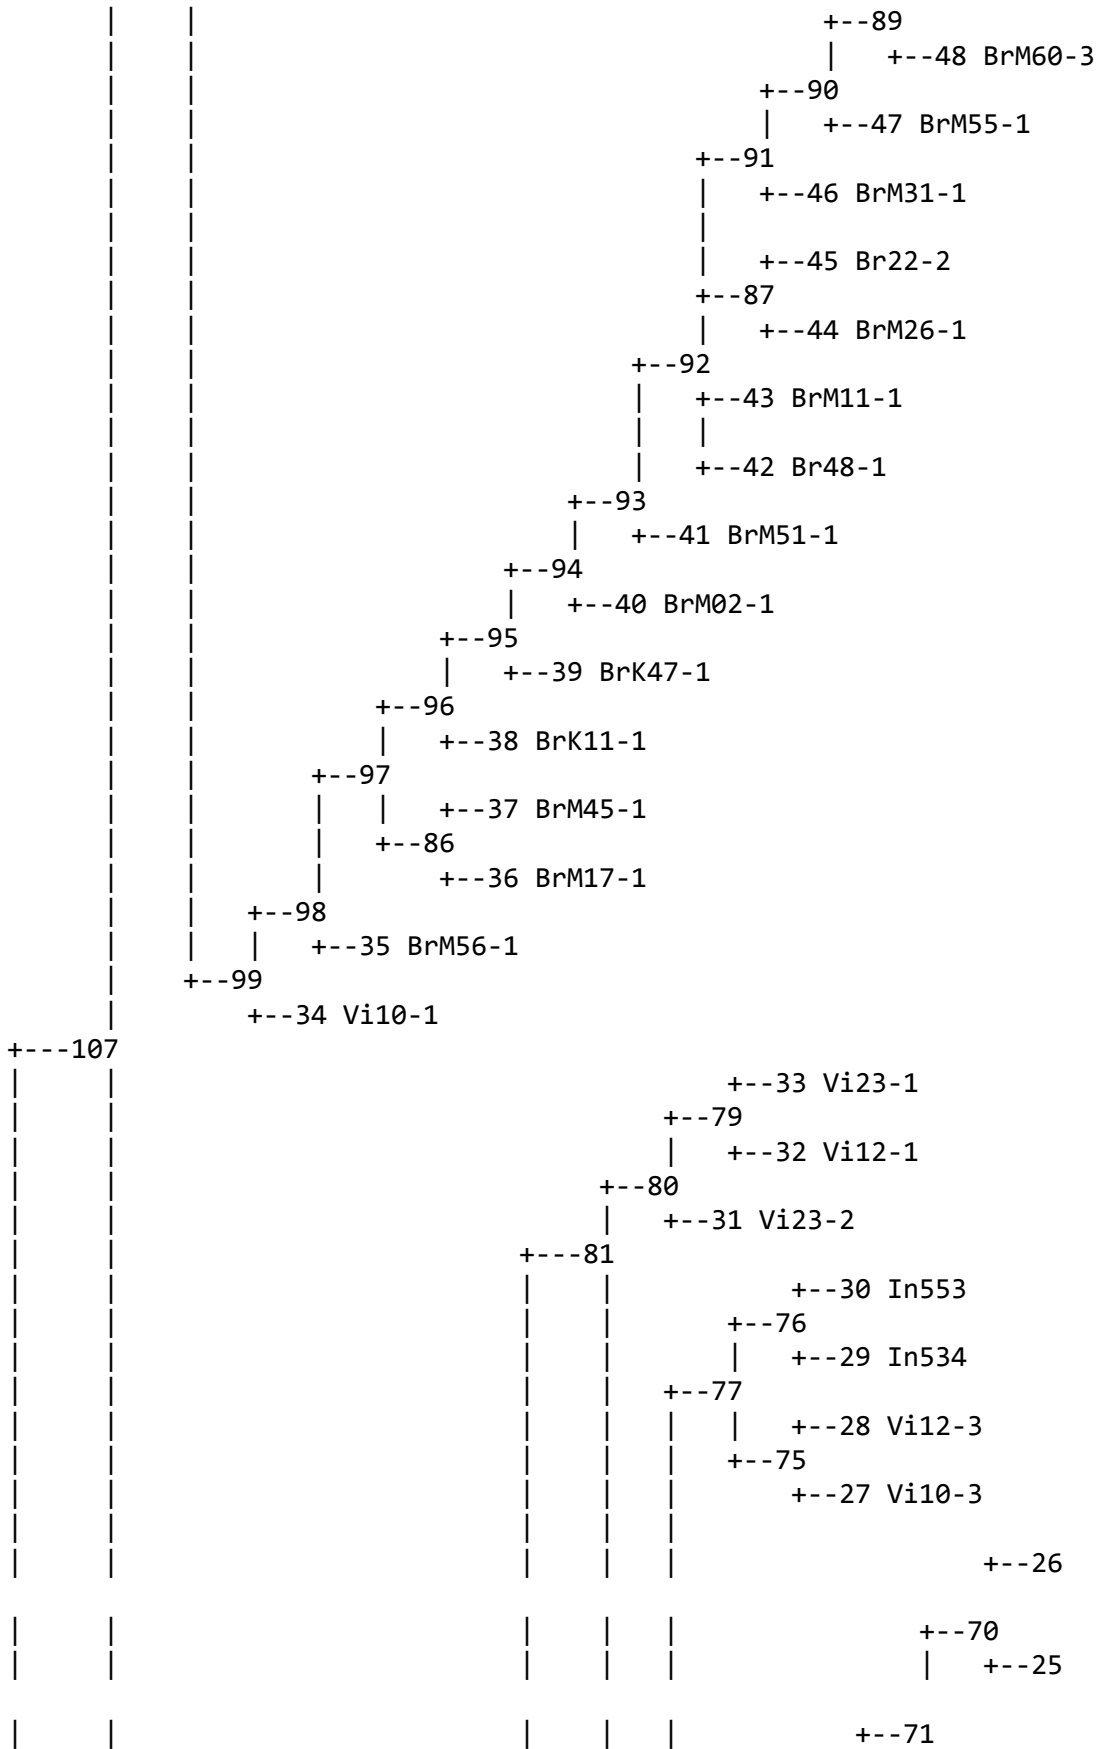

S1\_jModelTest2\_results\_for\_mtDNA.txt

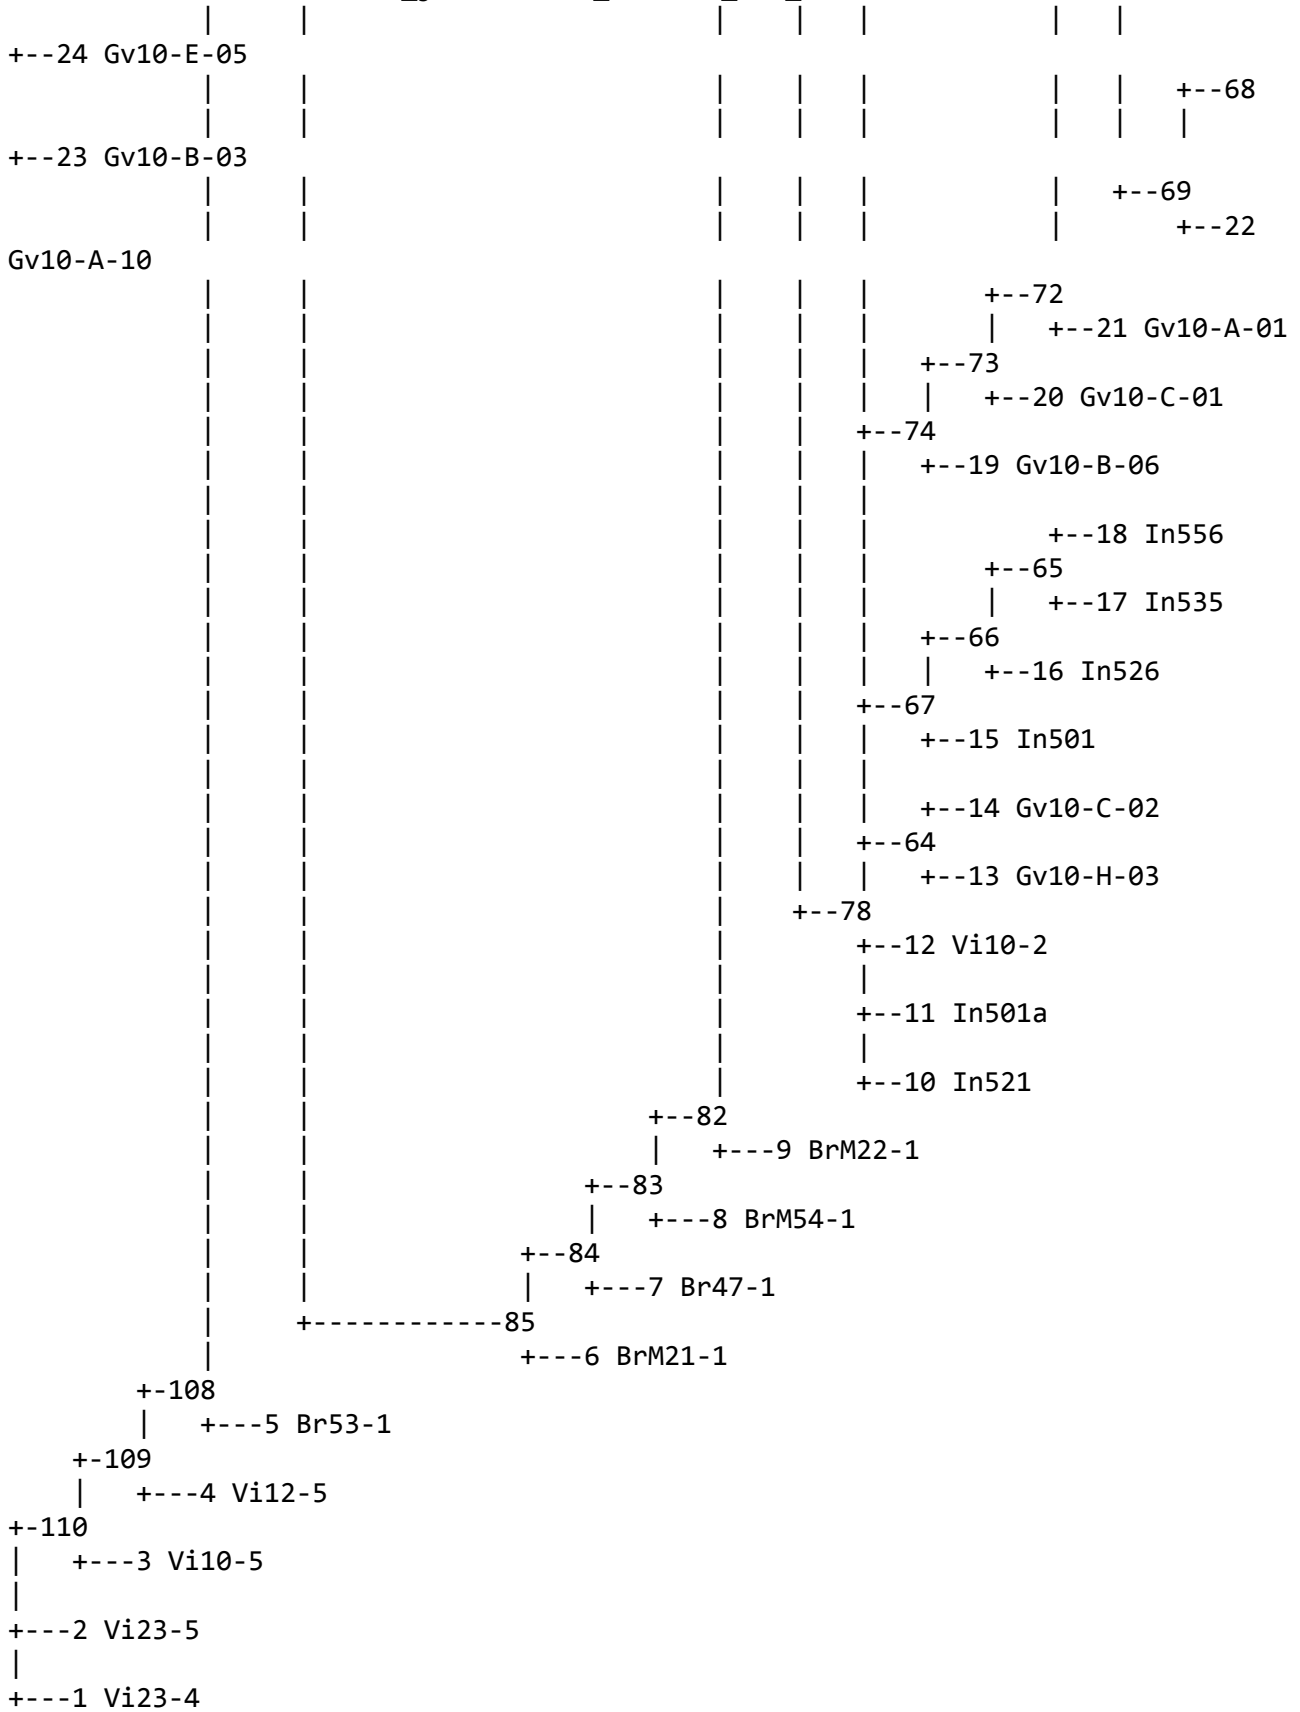

S1\_jModelTest2\_results\_for\_mtDNA.txt

(Vi23-4:0.000000,Vi23-5:0.000001,(Vi10-5:0.035613,(Vi12-5:0.013070,(Br53-1:0.000000,((BrM21-1:0.000000,(Br47-1:0.000000,(BrM54-1:0.000000,(BrM22-1:0.010375,((In521:0.011115,In501a:0.000000,Vi10-2:0.047162,(Gv10-H-03:0.022579,Gv10-C-02:0.000001)1.00:0.011164,(In501:0.023483,(In526:0.000000,(In535:0.011130,In556:0.011730)1.00:0.011238)1.00:0.010599)1.00:0.059538,(Gv10-B-06:0.000000,(Gv10-C-01:0.011226,(Gv10-A-01:0.000000,((Gv10-A-10:0.012433,(Gv10-B-03:0.011159,Gv10-E-05:0.000001)0.51:0.000001),(Gv10-F-08:0.011272,Gv10-B-02:0.011264)0.50:0.000001)1.00:0.011137)0.76:0.000001)0.69:0.000001)1.00:0.022454,((Vi10-3:0.022666,Vi12-3:0.000000)1.00:0.011170,(In534:0.000000,In553:0.011215)1.00:0.011217)0.73:0.000001)1.00:0.009671,(Vi23-2:0.022666,(Vi12-1:0.000000,Vi23-1:0.012000)0.54:0.000001)1.00:0.024623)1.00:0.086828)1.00:0.014676)0.52:0.000004)0.57:0.000004)1.00:0.208851,((Vi10-1:0.011881,(BrM56-1:0.012168,((BrM17-1:0.000000,BrM45-1:0.037007)1.00:0.011602,(BrK11-1:0.000000,(BrK47-1:0.011100,(BrM02-1:0.011117,(BrM51-1:0.011229,(Br48-1:0.000000,BrM11-1:0.011094,(BrM26-1:0.010854,Br22-2:0.013204)0.55:0.000538,(BrM31-1:0.011100,(BrM55-1:0.000000,(BrM60-3:0.000000,(BrK02-1:0.000000,BrM03-1:0.000000)1.00:0.000001)1.00:0.000000)1.00:0.000001)0.54:0.000001)1.00:0.000001)0.91:0.000001)0.91:0.000001)1.00:0.011157)0.85:0.000001)1.00:0.000001)1.00:0.027611)1.00:0.041705,((Gv10-A-08:0.000002,Gv10-F-10:0.000000)1.00:0.023923,((Br32-1:0.000001,(BrK55-1:0.000001,BrM48-2:0.011867,Br57-1:0.011939,Br22-1:0.000000,Br32-2:0.011849,BrM59-1:0.023106,Br26-2:0.000000,Br30-1:0.000001)0.85:0.011188)0.57:0.011452,(BrM23-1:0.004903,Br30-2:0.000001)0.57:0.006068)1.00:0.010795)1.00:0.052903)1.00:0.075406)1.00:0.090020)1.00:0.048168)1.00:0.010313)1.00:0.023292);

Note: this tree is unrooted. Branch lengths are the expected number of substitutions per site. Labels next to parentheses represent phylogenetic uncertainty due to model selection (see documentation)

S2\_jModelTest2\_nuclearSNPs.txt

----- jModeltest 2.1.7 v20150530 -----  
(c) 2011-onwards D. Darriba, G.L. Taboada, R. Doallo and D. Posada,  
(1) Department of Biochemistry, Genetics and Immunology  
University of Vigo, 36310 Vigo, Spain.  
(2) Department of Electronics and Systems  
University of A Coruna, 15071 A Coruna, Spain.  
e-mail: ddarriba@udc.es, dposada@uvigo.es  
-----

Wed Jun 24 12:30:25 AEST 2015  
Linux 3.2.0-76-virtual, arch: amd64, bits: 64, numcores: 16

jModelTest 2.1.7 v20150530  
Copyright (C) 2011 D. Darriba, G.L. Taboada, R. Doallo and D. Posada  
This program comes with ABSOLUTELY NO WARRANTY  
This is free software, and you are welcome to redistribute it under certain  
conditions

Notice: This program may contain errors. Please inspect results carefully.

-----  
Citation: Darriba D, Taboada GL, Doallo R and Posada D. 2012.  
"jModelTest 2: more models, new heuristics and parallel computing".  
Nature Methods 9(8), 772.  
-----

Reading data file "S2\_File\_relaxed\_phylip\_format\_nuclearSNPs.phy"... OK.  
number of sequences: 80  
number of sites: 5815

-----  
\* \* \*  
\* COMPUTATION OF LIKELIHOOD SCORES WITH PHYML \*  
\* \* \*  
-----

::Settings::

Phyml version = 3.0  
Phyml binary = PhyML\_3.0\_linux64  
Phyml path = /usr/local/bin/jmodeltest-2.1.7/exe/phyml/  
Candidate models = 44  
number of substitution schemes = 11  
including models with equal/unequal base frequencies (+F)  
including only models without a proportion of invariable sites  
including models with/without rate variation among sites (+G) (nCat = 4)  
Optimized free parameters (K) = substitution parameters + 157 branch lengths +  
topology  
Base tree for likelihood calculations = ML tree  
Tree topology search operation = BEST



S2\_jModelTest2\_nuclearSNPs.txt

::Progress::

| Model    | Exec. Time   | Total Time   | -lnL       |
|----------|--------------|--------------|------------|
| TPM3uf+G | 00h:55:06:05 | 00h:55:08:04 | 61658.0498 |
| TVM+G    | 01h:01:05:07 | 01h:01:08:01 | 61558.8827 |
| GTR+G    | 01h:01:50:02 | 01h:01:52:00 | 61558.1060 |
| TPM1uf+G | 01h:02:18:02 | 01h:02:20:04 | 61734.2289 |
| TrNef+G  | 01h:04:03:06 | 01h:04:06:03 | 61736.9019 |
| TrN+G    | 01h:04:43:09 | 01h:04:46:07 | 61733.8373 |
| JC+G     | 01h:06:15:00 | 01h:06:16:04 | 65022.9432 |
| TIM2+G   | 01h:06:35:00 | 01h:06:36:06 | 61625.6673 |
| F81+G    | 01h:06:34:09 | 01h:06:37:08 | 64978.4529 |
| TPM1+G   | 01h:08:36:02 | 01h:08:37:06 | 61729.7674 |
| TPM2uf+G | 01h:11:26:00 | 01h:11:27:08 | 61641.0374 |
| TIM3+G   | 01h:23:42:06 | 01h:23:44:06 | 61677.9402 |
| F81      | 00h:21:57:01 | 01h:28:13:05 | 71202.2927 |
| TPM2uf   | 00h:18:04:07 | 01h:29:32:05 | 68310.1535 |
| TPM1uf   | 00h:22:42:06 | 01h:31:20:03 | 68377.7152 |
| TrN      | 00h:27:58:06 | 01h:34:36:05 | 68408.1535 |
| HKY      | 00h:29:07:02 | 01h:35:43:08 | 68368.7775 |
| TPM3uf   | 00h:17:17:07 | 01h:41:02:03 | 68324.2042 |
| HKY+G    | 01h:47:53:07 | 01h:47:55:00 | 61734.2389 |
| TIM1+G   | 01h:47:57:05 | 01h:47:58:09 | 61732.7638 |
| TIM3     | 00h:22:49:06 | 01h:54:09:09 | 68295.5642 |
| TIM2     | 00h:26:45:09 | 01h:56:18:05 | 68270.6044 |
| TIM1     | 00h:30:08:06 | 01h:58:22:02 | 68372.8865 |
| JC       | 00h:18:04:01 | 01h:59:06:04 | 71122.5971 |
| TVM      | 00h:26:00:07 | 02h:00:37:02 | 68184.6193 |
| GTR      | 00h:26:56:02 | 02h:02:40:00 | 68181.7387 |
| K80      | 00h:19:58:01 | 02h:07:53:02 | 68334.1545 |
| TPM2+G   | 02h:08:02:05 | 02h:08:03:09 | 61656.4629 |
| TPM3+G   | 01h:13:06:08 | 02h:08:15:02 | 61674.9791 |
| TrNef    | 00h:20:18:08 | 02h:08:17:08 | 68298.2962 |
| TPM2     | 00h:17:06:08 | 02h:13:25:03 | 68215.1133 |
| TPM1     | 00h:19:28:07 | 02h:13:38:06 | 68301.0598 |
| TVMef+G  | 01h:09:55:01 | 02h:14:01:04 | 61603.8177 |
| SYM+G    | 01h:13:06:07 | 02h:17:53:04 | 61566.0936 |
| TIM3ef   | 00h:18:21:07 | 02h:21:01:08 | 68266.4356 |
| TIM2ef   | 00h:21:14:07 | 02h:21:51:09 | 68182.2332 |
| TPM3     | 00h:25:06:04 | 02h:23:28:05 | 68269.2482 |
| SYM      | 00h:16:15:05 | 02h:24:19:05 | 68116.7293 |
| TIM1ef   | 00h:27:55:07 | 02h:27:02:01 | 68331.5166 |
| TVMef    | 00h:20:45:02 | 02h:28:38:04 | 68107.7087 |
| TIM3ef+G | 01h:26:19:09 | 02h:28:40:04 | 61655.2850 |
| TIM2ef+G | 01h:33:15:04 | 02h:35:07:05 | 61634.5858 |
| TIM1ef+G | 01h:39:25:09 | 02h:40:34:01 | 61739.0038 |
| K80+G    | 02h:54:17:08 | 02h:54:19:04 | 61737.3571 |

::Results::

S2\_jModelTest2\_nuclearSNPs.txt

Model = JC  
partition = 000000  
-lnL = 71122.5971  
K = 158

Model = JC+G  
partition = 000000  
-lnL = 65022.9431  
K = 159  
gamma shape = 0.3100

Model = F81  
partition = 000000  
-lnL = 71202.2927  
K = 161  
freqA = 0.2651  
freqC = 0.2409  
freqG = 0.2401  
freqT = 0.2540

Model = F81+G  
partition = 000000  
-lnL = 64978.4529  
K = 162  
freqA = 0.2740  
freqC = 0.2346  
freqG = 0.2350  
freqT = 0.2564  
gamma shape = 0.3100

Model = K80  
partition = 010010  
-lnL = 68334.1545  
K = 159  
kappa = 4.3761 (ti/tv = 2.1881)

Model = K80+G  
partition = 010010  
-lnL = 61737.3571  
K = 160  
kappa = 5.2739 (ti/tv = 2.6369)  
gamma shape = 0.2930

Model = HKY  
partition = 010010  
-lnL = 68368.7774  
K = 162  
freqA = 0.2579  
freqC = 0.2519  
freqG = 0.2439  
freqT = 0.2463  
kappa = 4.3939 (ti/tv = 2.1960)

S2\_jModelTest2\_nuclearSNPs.txt

Model = HKY+G  
partition = 010010  
-lnL = 61734.2389  
K = 163  
freqA = 0.2686  
freqC = 0.2412  
freqG = 0.2336  
freqT = 0.2566  
kappa = 5.2131 (ti/tv = 2.5990)  
gamma shape = 0.2940

Model = TrNef  
partition = 010020  
-lnL = 68298.2962  
K = 160  
R(a) [AC] = 1.0000  
R(b) [AG] = 4.5470  
R(c) [AT] = 1.0000  
R(d) [CG] = 1.0000  
R(e) [CT] = 4.2985  
R(f) [GT] = 1.0000

Model = TrNef+G  
partition = 010020  
-lnL = 61736.9019  
K = 161  
R(a) [AC] = 1.0000  
R(b) [AG] = 5.3795  
R(c) [AT] = 1.0000  
R(d) [CG] = 1.0000  
R(e) [CT] = 5.1697  
R(f) [GT] = 1.0000  
gamma shape = 0.2930

Model = TrN  
partition = 010020  
-lnL = 68408.1535  
K = 163  
freqA = 0.2554  
freqC = 0.2539  
freqG = 0.2431  
freqT = 0.2476  
R(a) [AC] = 1.0000  
R(b) [AG] = 4.4915  
R(c) [AT] = 1.0000  
R(d) [CG] = 1.0000  
R(e) [CT] = 4.2917  
R(f) [GT] = 1.0000

Model = TrN+G  
partition = 010020

S2\_jModelTest2\_nuclearSNPs.txt

-lnL = 61733.8373  
K = 164  
freqA = 0.2668  
freqC = 0.2429  
freqG = 0.2320  
freqT = 0.2584  
R(a) [AC] = 1.0000  
R(b) [AG] = 5.3138  
R(c) [AT] = 1.0000  
R(d) [CG] = 1.0000  
R(e) [CT] = 5.1132  
R(f) [GT] = 1.0000  
gamma shape = 0.2940

Model = TPM1  
partition = 012210  
-lnL = 68301.0598  
K = 160  
R(a) [AC] = 1.0000  
R(b) [AG] = 4.4152  
R(c) [AT] = 0.9962  
R(d) [CG] = 0.9962  
R(e) [CT] = 4.4152  
R(f) [GT] = 1.0000

Model = TPM1+G  
partition = 012210  
-lnL = 61729.7674  
K = 161  
R(a) [AC] = 1.0000  
R(b) [AG] = 5.2854  
R(c) [AT] = 1.0008  
R(d) [CG] = 1.0008  
R(e) [CT] = 5.2854  
R(f) [GT] = 1.0000  
gamma shape = 0.2930

Model = TPM1uf  
partition = 012210  
-lnL = 68377.7152  
K = 163  
freqA = 0.2576  
freqC = 0.2507  
freqG = 0.2461  
freqT = 0.2457  
R(a) [AC] = 1.0000  
R(b) [AG] = 4.3788  
R(c) [AT] = 1.0068  
R(d) [CG] = 1.0068  
R(e) [CT] = 4.3788  
R(f) [GT] = 1.0000

S2\_jModelTest2\_nuclearSNPs.txt

Model = TPM1uf+G  
partition = 012210  
-lnL = 61734.2289  
K = 164  
freqA = 0.2686  
freqC = 0.2412  
freqG = 0.2336  
freqT = 0.2566  
R(a) [AC] = 1.0000  
R(b) [AG] = 5.2272  
R(c) [AT] = 1.0055  
R(d) [CG] = 1.0055  
R(e) [CT] = 5.2272  
R(f) [GT] = 1.0000  
gamma shape = 0.2940

Model = TPM2  
partition = 010212  
-lnL = 68215.1133  
K = 160  
R(a) [AC] = 1.7362  
R(b) [AG] = 5.9297  
R(c) [AT] = 1.7362  
R(d) [CG] = 1.0000  
R(e) [CT] = 5.9297  
R(f) [GT] = 1.0000

Model = TPM2+G  
partition = 010212  
-lnL = 61656.4629  
K = 161  
R(a) [AC] = 1.7511  
R(b) [AG] = 7.1695  
R(c) [AT] = 1.7511  
R(d) [CG] = 1.0000  
R(e) [CT] = 7.1695  
R(f) [GT] = 1.0000  
gamma shape = 0.2940

Model = TPM2uf  
partition = 010212  
-lnL = 68310.1535  
K = 163  
freqA = 0.2394  
freqC = 0.2519  
freqG = 0.2620  
freqT = 0.2467  
R(a) [AC] = 1.7894  
R(b) [AG] = 5.9917  
R(c) [AT] = 1.7894  
R(d) [CG] = 1.0000  
R(e) [CT] = 5.9917

R(f) [GT] = 1.0000

Model = TPM2uf+G  
partition = 010212  
-lnL = 61641.0374  
K = 164  
freqA = 0.2421  
freqC = 0.2413  
freqG = 0.2589  
freqT = 0.2577  
R(a) [AC] = 1.8427  
R(b) [AG] = 7.2675  
R(c) [AT] = 1.8427  
R(d) [CG] = 1.0000  
R(e) [CT] = 7.2675  
R(f) [GT] = 1.0000  
gamma shape = 0.2960

Model = TPM3  
partition = 012012  
-lnL = 68269.2482  
K = 160  
R(a) [AC] = 0.6607  
R(b) [AG] = 3.6092  
R(c) [AT] = 1.0000  
R(d) [CG] = 0.6607  
R(e) [CT] = 3.6092  
R(f) [GT] = 1.0000

Model = TPM3+G  
partition = 012012  
-lnL = 61674.9791  
K = 161  
R(a) [AC] = 0.6686  
R(b) [AG] = 4.3651  
R(c) [AT] = 1.0000  
R(d) [CG] = 0.6686  
R(e) [CT] = 4.3651  
R(f) [GT] = 1.0000  
gamma shape = 0.2940

Model = TPM3uf  
partition = 012012  
-lnL = 68324.2042  
K = 163  
freqA = 0.2572  
freqC = 0.2655  
freqG = 0.2460  
freqT = 0.2314  
R(a) [AC] = 0.6106  
R(b) [AG] = 3.4656  
R(c) [AT] = 1.0000

S2\_jModelTest2\_nuclearSNPs.txt

R(d) [CG] = 0.6106  
R(e) [CT] = 3.4656  
R(f) [GT] = 1.0000

Model = TPM3uf+G  
partition = 012012  
-lnL = 61658.0498  
K = 164  
freqA = 0.2691  
freqC = 0.2624  
freqG = 0.2335  
freqT = 0.2351  
R(a) [AC] = 0.6190  
R(b) [AG] = 4.1696  
R(c) [AT] = 1.0000  
R(d) [CG] = 0.6190  
R(e) [CT] = 4.1696  
R(f) [GT] = 1.0000  
gamma shape = 0.2950

Model = TIM1ef  
partition = 012230  
-lnL = 68331.5166  
K = 161  
R(a) [AC] = 1.0000  
R(b) [AG] = 4.4943  
R(c) [AT] = 0.9998  
R(d) [CG] = 0.9998  
R(e) [CT] = 4.2550  
R(f) [GT] = 1.0000

Model = TIM1ef+G  
partition = 012230  
-lnL = 61739.0038  
K = 162  
R(a) [AC] = 1.0000  
R(b) [AG] = 5.3652  
R(c) [AT] = 0.9957  
R(d) [CG] = 0.9957  
R(e) [CT] = 5.1514  
R(f) [GT] = 1.0000  
gamma shape = 0.2930

Model = TIM1  
partition = 012230  
-lnL = 68372.8865  
K = 164  
freqA = 0.2542  
freqC = 0.2547  
freqG = 0.2416  
freqT = 0.2496  
R(a) [AC] = 1.0000

S2\_jModelTest2\_nuclearSNPs.txt

R(b) [AG] = 4.5441  
R(c) [AT] = 1.0142  
R(d) [CG] = 1.0142  
R(e) [CT] = 4.2981  
R(f) [GT] = 1.0000

Model = TIM1+G  
partition = 012230  
-lnL = 61732.7638  
K = 165  
freqA = 0.2667  
freqC = 0.2427  
freqG = 0.2321  
freqT = 0.2585  
R(a) [AC] = 1.0000  
R(b) [AG] = 5.3456  
R(c) [AT] = 1.0063  
R(d) [CG] = 1.0063  
R(e) [CT] = 5.1183  
R(f) [GT] = 1.0000  
gamma shape = 0.2940

Model = TIM2ef  
partition = 010232  
-lnL = 68182.2332  
K = 161  
R(a) [AC] = 1.7307  
R(b) [AG] = 6.0785  
R(c) [AT] = 1.7307  
R(d) [CG] = 1.0000  
R(e) [CT] = 5.7367  
R(f) [GT] = 1.0000

Model = TIM2ef+G  
partition = 010232  
-lnL = 61634.5858  
K = 162  
R(a) [AC] = 1.7462  
R(b) [AG] = 7.2513  
R(c) [AT] = 1.7462  
R(d) [CG] = 1.0000  
R(e) [CT] = 7.0416  
R(f) [GT] = 1.0000  
gamma shape = 0.2940

Model = TIM2  
partition = 010232  
-lnL = 68270.6044  
K = 164  
freqA = 0.2346  
freqC = 0.2563  
freqG = 0.2593



S2\_jModelTest2\_nuclearSNPs.txt

freqT = 0.2499  
R(a) [AC] = 1.8030  
R(b) [AG] = 6.3029  
R(c) [AT] = 1.8030  
R(d) [CG] = 1.0000  
R(e) [CT] = 5.8036  
R(f) [GT] = 1.0000

Model = TIM2+G  
partition = 010232  
-lnL = 61625.6673  
K = 165  
freqA = 0.2411  
freqC = 0.2435  
freqG = 0.2568  
freqT = 0.2587  
R(a) [AC] = 1.8378  
R(b) [AG] = 7.3979  
R(c) [AT] = 1.8378  
R(d) [CG] = 1.0000  
R(e) [CT] = 7.1540  
R(f) [GT] = 1.0000  
gamma shape = 0.2960

Model = TIM3ef  
partition = 012032  
-lnL = 68266.4356  
K = 161  
R(a) [AC] = 0.6609  
R(b) [AG] = 3.7113  
R(c) [AT] = 1.0000  
R(d) [CG] = 0.6609  
R(e) [CT] = 3.5075  
R(f) [GT] = 1.0000

Model = TIM3ef+G  
partition = 012032  
-lnL = 61655.2850  
K = 162  
R(a) [AC] = 0.6700  
R(b) [AG] = 4.4754  
R(c) [AT] = 1.0000  
R(d) [CG] = 0.6700  
R(e) [CT] = 4.2547  
R(f) [GT] = 1.0000  
gamma shape = 0.2940

Model = TIM3  
partition = 012032  
-lnL = 68295.5642  
K = 164  
freqA = 0.2530

S2\_jModelTest2\_nuclearSNPs.txt

freqC = 0.2685  
freqG = 0.2450  
freqT = 0.2335  
R(a) [AC] = 0.6112  
R(b) [AG] = 3.5482  
R(c) [AT] = 1.0000  
R(d) [CG] = 0.6112  
R(e) [CT] = 3.4163  
R(f) [GT] = 1.0000

Model = TIM3+G  
partition = 012032  
-lnL = 61677.9402  
K = 165  
freqA = 0.2667  
freqC = 0.2637  
freqG = 0.2320  
freqT = 0.2375  
R(a) [AC] = 0.6157  
R(b) [AG] = 4.2209  
R(c) [AT] = 1.0000  
R(d) [CG] = 0.6157  
R(e) [CT] = 4.0620  
R(f) [GT] = 1.0000  
gamma shape = 0.2960

Model = TVMef  
partition = 012314  
-lnL = 68107.7087  
K = 162  
R(a) [AC] = 1.1301  
R(b) [AG] = 4.7178  
R(c) [AT] = 1.6466  
R(d) [CG] = 0.6185  
R(e) [CT] = 4.7178  
R(f) [GT] = 1.0000

Model = TVMef+G  
partition = 012314  
-lnL = 61603.8177  
K = 163  
R(a) [AC] = 1.1715  
R(b) [AG] = 5.7355  
R(c) [AT] = 1.6549  
R(d) [CG] = 0.6101  
R(e) [CT] = 5.7355  
R(f) [GT] = 1.0000  
gamma shape = 0.2960

Model = TVM  
partition = 012314  
-lnL = 68184.6193

S2\_jModelTest2\_nuclearSNPs.txt

K = 165  
freqA = 0.2393  
freqC = 0.2667  
freqG = 0.2631  
freqT = 0.2310  
R(a) [AC] = 1.1020  
R(b) [AG] = 4.6451  
R(c) [AT] = 1.7205  
R(d) [CG] = 0.5723  
R(e) [CT] = 4.6451  
R(f) [GT] = 1.0000

Model = TVM+G  
partition = 012314  
-lnL = 61558.8827

K = 166  
freqA = 0.2418  
freqC = 0.2625  
freqG = 0.2602  
freqT = 0.2356  
R(a) [AC] = 1.1354  
R(b) [AG] = 5.6417  
R(c) [AT] = 1.7373  
R(d) [CG] = 0.5643  
R(e) [CT] = 5.6417  
R(f) [GT] = 1.0000  
gamma shape = 0.2960

Model = SYM  
partition = 012345  
-lnL = 68116.7293

K = 163  
R(a) [AC] = 1.1336  
R(b) [AG] = 4.7835  
R(c) [AT] = 1.6399  
R(d) [CG] = 0.6070  
R(e) [CT] = 4.5802  
R(f) [GT] = 1.0000

Model = SYM+G  
partition = 012345  
-lnL = 61566.0936

K = 164  
R(a) [AC] = 1.1638  
R(b) [AG] = 5.8354  
R(c) [AT] = 1.6479  
R(d) [CG] = 0.6129  
R(e) [CT] = 5.5773  
R(f) [GT] = 1.0000  
gamma shape = 0.2950

Model = GTR

S2\_jModelTest2\_nuclearSNPs.txt

partition = 012345  
-lnL = 68181.7387  
K = 166  
freqA = 0.2352  
freqC = 0.2711  
freqG = 0.2586  
freqT = 0.2351  
R(a) [AC] = 1.1060  
R(b) [AG] = 4.8345  
R(c) [AT] = 1.7226  
R(d) [CG] = 0.5732  
R(e) [CT] = 4.4753  
R(f) [GT] = 1.0000

Model = GTR+G  
partition = 012345  
-lnL = 61558.1060  
K = 167  
freqA = 0.2395  
freqC = 0.2649  
freqG = 0.2577  
freqT = 0.2378  
R(a) [AC] = 1.1361  
R(b) [AG] = 5.7950  
R(c) [AT] = 1.7371  
R(d) [CG] = 0.5645  
R(e) [CT] = 5.4939  
R(f) [GT] = 1.0000  
gamma shape = 0.2960

Computation of likelihood scores completed. It took 02h:54:20:00.

-----  
\* AKAIKE INFORMATION CRITERION (AIC) \*  
\* \* \*  
-----

Model selected:  
Model = TVM+G  
partition = 012314  
-lnL = 61558.8827  
K = 166  
freqA = 0.2418  
freqC = 0.2625  
freqG = 0.2602  
freqT = 0.2356  
R(a) [AC] = 1.1354

S2\_jModelTest2\_nuclearSNPs.txt

R(b) [AG] = 5.6417  
 R(c) [AT] = 1.7373  
 R(d) [CG] = 0.5643  
 R(e) [CT] = 5.6417  
 R(f) [GT] = 1.0000  
 gamma shape = 0.2960

Tree for the best AIC model =

(BrM57-1:0.05184835,BrM52-1:0.02481505,(((Br22-1:0.02667606,(BrK47-1:0.02701996,Br53-1:0.04815373):0.02208776):0.01871902,(BrM55-1:0.04000213,(((Br32-2:0.01240354,Br32-1:0.00642996):0.04154640,((((BrM54-1:0.02701382,(BrM03-1:0.02438801,BrM48-1:0.01571118):0.01712576):0.00396741,(BrK01-1:0.03076228,Br48-1:0.02813910):0.01663572):0.00652506,(BrM23-1:0.02953622,BrK55-1:0.04354231):0.00851064):0.00873969,(((BrM17-1:0.04790729,(((BrM21-1:0.02014617,BrM46-1:0.01850240):0.00955021,(BrM11-1:0.02447278,(BrM02-1:0.03426506,BrM45-1:0.02159593):0.01278838):0.00941077):0.01133245,(BrK60-1:0.02767988,BrM27-1:0.05315693):0.01126936):0.00430149):0.01542212,(BrM51-1:0.02858213,(BrM60-3:0.03202376,BrM56-1:0.02381812):0.00978972):0.01241428):0.00832603,(((Gv10-C-05:0.03742512,(((Gv10-F-02:0.03588325,(Gv10-F-10:0.02018756,Gv10-C-01:0.02574039):0.00621799):0.00878015,(Gv10-H-05:0.05069153,(Gv10-C-10:0.03051322,Gv10-B-10:0.02649966):0.00868768):0.01495560):0.00999886,(((Gv10-A-01:0.02576386,Gv10-F-08:0.02650691):0.01317507,(Gv10-E-05:0.02155003,Gv10-B-02:0.02565866):0.02025356):0.00726833,(Gv10-H-03:0.03871319,(Gv10-B-06:0.03513156,(Gv10-H-07:0.02167510,(Gv10-A-10:0.02247929,Gv10-A-08:0.04187486):0.01247824):0.00880607):0.00383106):0.01138859):0.00964483):0.01929322):0.01833202,(Vi10-2:0.04823806,(((In527:0.02881058,In501a:0.03531808):0.00547463,(In526:0.02679181,(In521:0.02985924,(In553:0.01972704,In556:0.01803529):0.00578453):0.01577886):0.00702218):0.00812514,(((In525:0.03279834,(In534:0.02107552,In547:0.02513353):0.00995907):0.00794735,(In535:0.02528658,In501:0.07093160):0.01316442):0.00653160):0.02934495,(Vi10-3:0.03290398,(((Vi12-1:0.02855969,Vi23-1:0.03010831):0.01518933,(Vi12-3:0.03465353,(Vi10-5:0.02521269,(Vi23-4:0.00274956,Vi23-5:0.00346170):0.03588859):0.01114353):0.00630121):0.00719443,(Vi12-5:0.03024567,Vi10-1:0.02404323):0.01317145):0.00958228):0.00963673):0.01494860):0.00928272):0.05962352,((BrM22-1:0.03659096,(Br47-1:0.00276123,Br47-2:0.00381655):0.04294608):0.00868814,(BrM59-1:0.02168672,(BrK04-1:0.02484032,BrK02-1:0.03544618):0.01089521):0.00765011):0.00655924):0.00666815):0.00811131):0.00454601,(Br22-2:0.03157420,((Br46-1:0.00594556,Br46-2:0.00261128):0.04079829,(BrK06-1:0.03215895,(Br30-1:0.00631662,Br30-2:0.00176267):0.04133231):0.01201340):0.01266911):0.01223314):0.00432845):0.00571023,(BrM50-1:0.06126366,(Br26-2:0.00195747,Br26-1:0.00928642):0.02330916,(Br57-1:0.00118969,Br57-2:0.00603894):0.01954434):0.03123921):0.01782641):0.01004522):0.01302960):0.03111852);

\* AIC MODEL SELECTION : Selection uncertainty

| Model    | -lnL        | K   | AIC           | delta      | weight    | cumWeight |
|----------|-------------|-----|---------------|------------|-----------|-----------|
| TVM+G    | 61558.88268 | 166 | 123449.765360 | 0.000000   | 0.553915  | 0.553915  |
| GTR+G    | 61558.10598 | 167 | 123450.211960 | 0.446600   | 0.443063  | 0.996977  |
| SYM+G    | 61566.09357 | 164 | 123460.187140 | 10.421780  | 0.003023  | 1.000000  |
| TVMef+G  | 61603.81770 | 163 | 123533.635400 | 83.870040  | 3.40e-019 | 1.000000  |
| TIM2+G   | 61625.66732 | 165 | 123581.334640 | 131.569280 | 1.49e-029 | 1.000000  |
| TIM2ef+G | 61634.58579 | 162 | 123593.171580 | 143.406220 | 4.01e-032 | 1.000000  |
| TPM2uf+G | 61641.03736 | 164 | 123610.074720 | 160.309360 | 8.56e-036 | 1.000000  |

## S2\_jModelTest2\_nuclearSNPs.txt

|          |             |     |               |              |           |          |
|----------|-------------|-----|---------------|--------------|-----------|----------|
| TIM3ef+G | 61655.28503 | 162 | 123634.570060 | 184.804700   | 4.11e-041 | 1.000000 |
| TPM2+G   | 61656.46286 | 161 | 123634.925720 | 185.160360   | 3.44e-041 | 1.000000 |
| TPM3uf+G | 61658.04982 | 164 | 123644.099640 | 194.334280   | 3.50e-043 | 1.000000 |
| TPM3+G   | 61674.97907 | 161 | 123671.958140 | 222.192780   | 3.13e-049 | 1.000000 |
| TIM3+G   | 61677.94019 | 165 | 123685.880380 | 236.115020   | 2.96e-052 | 1.000000 |
| TPM1+G   | 61729.76738 | 161 | 123781.534760 | 331.769400   | 5.02e-073 | 1.000000 |
| HKY+G    | 61734.23893 | 163 | 123794.477860 | 344.712500   | 7.76e-076 | 1.000000 |
| K80+G    | 61737.35709 | 160 | 123794.714180 | 344.948820   | 6.90e-076 | 1.000000 |
| TIM1+G   | 61732.76377 | 165 | 123795.527540 | 345.762180   | 4.59e-076 | 1.000000 |
| TrN+G    | 61733.83731 | 164 | 123795.674620 | 345.909260   | 4.27e-076 | 1.000000 |
| TrNef+G  | 61736.90190 | 161 | 123795.803800 | 346.038440   | 4.00e-076 | 1.000000 |
| TPM1uf+G | 61734.22890 | 164 | 123796.457800 | 346.692440   | 2.88e-076 | 1.000000 |
| TIM1ef+G | 61739.00377 | 162 | 123802.007540 | 352.242180   | 1.80e-077 | 1.000000 |
| F81+G    | 64978.45294 | 162 | 130280.905880 | 6831.140520  | 0.00e+000 | 1.000000 |
| JC+G     | 65022.94315 | 159 | 130363.886300 | 6914.120940  | 0.00e+000 | 1.000000 |
| TVMef    | 68107.70867 | 162 | 136539.417340 | 13089.651980 | 0.00e+000 | 1.000000 |
| SYM      | 68116.72925 | 163 | 136559.458500 | 13109.693140 | 0.00e+000 | 1.000000 |
| TIM2ef   | 68182.23319 | 161 | 136686.466380 | 13236.701020 | 0.00e+000 | 1.000000 |
| GTR      | 68181.73869 | 166 | 136695.477380 | 13245.712020 | 0.00e+000 | 1.000000 |
| TVM      | 68184.61931 | 165 | 136699.238620 | 13249.473260 | 0.00e+000 | 1.000000 |
| TPM2     | 68215.11327 | 160 | 136750.226540 | 13300.461180 | 0.00e+000 | 1.000000 |
| TIM3ef   | 68266.43558 | 161 | 136854.871160 | 13405.105800 | 0.00e+000 | 1.000000 |
| TPM3     | 68269.24816 | 160 | 136858.496320 | 13408.730960 | 0.00e+000 | 1.000000 |
| TIM2     | 68270.60438 | 164 | 136869.208760 | 13419.443400 | 0.00e+000 | 1.000000 |
| TrNef    | 68298.29619 | 160 | 136916.592380 | 13466.827020 | 0.00e+000 | 1.000000 |
| TIM3     | 68295.56421 | 164 | 136919.128420 | 13469.363060 | 0.00e+000 | 1.000000 |
| TPM1     | 68301.05979 | 160 | 136922.119580 | 13472.354220 | 0.00e+000 | 1.000000 |
| TPM2uf   | 68310.15349 | 163 | 136946.306980 | 13496.541620 | 0.00e+000 | 1.000000 |
| TPM3uf   | 68324.20415 | 163 | 136974.408300 | 13524.642940 | 0.00e+000 | 1.000000 |
| TIM1ef   | 68331.51662 | 161 | 136985.033240 | 13535.267880 | 0.00e+000 | 1.000000 |
| K80      | 68334.15449 | 159 | 136986.308980 | 13536.543620 | 0.00e+000 | 1.000000 |
| HKY      | 68368.77745 | 162 | 137061.554900 | 13611.789540 | 0.00e+000 | 1.000000 |
| TIM1     | 68372.88645 | 164 | 137073.772900 | 13624.007540 | 0.00e+000 | 1.000000 |
| TPM1uf   | 68377.71524 | 163 | 137081.430480 | 13631.665120 | 0.00e+000 | 1.000000 |

S2\_jModelTest2\_nuclearSNPs.txt

| Model | -lnL        | K   | AIC           | delta        | weight    | cumWeight |
|-------|-------------|-----|---------------|--------------|-----------|-----------|
| TrN   | 68408.15354 | 163 | 137142.307080 | 13692.541720 | 0.00e+000 | 1.000000  |
| JC    | 71122.59713 | 158 | 142561.194260 | 19111.428900 | 0.00e+000 | 1.000000  |
| F81   | 71202.29269 | 161 | 142726.585380 | 19276.820020 | 0.00e+000 | 1.000000  |

-----  
 -lnL: negative log likelihood  
 K: number of estimated parameters  
 AIC: Akaike Information Criterion  
 delta: AIC difference  
 weight: AIC weight  
 cumWeight: cumulative AIC weight

Model selection results also available at the "Model > Show model table" menu

\* AIC MODEL SELECTION : Confidence interval

There are 2 models in the 95% confidence interval: [ TVM+G GTR+G ]

\* AIC MODEL SELECTION : Parameter importance

| Parameter | Importance |
|-----------|------------|
| fA        | 1.0000     |
| fC        | 1.0000     |
| fG        | 1.0000     |
| fT        | 1.0000     |
| kappa     | 0.0000     |
| titv      | 0.0000     |
| rAC       | 1.0000     |
| rAG       | 1.0000     |
| rAT       | 1.0000     |
| rCG       | 1.0000     |
| rCT       | 1.0000     |
| rGT       | 1.0000     |
| alpha(G)  | 1.0000     |

-----  
 Values have been rounded.  
 (I): considers only +I models.  
 (G): considers only +G models.  
 (IG): considers only +I+G models.

\* AIC MODEL SELECTION : Model averaged estimates

| Parameter | Model-averaged estimates |
|-----------|--------------------------|
| fA        | 0.2408                   |

S2\_jModelTest2\_nuclearSNPs.txt

```
fc          0.2636
fG          0.2591
fT          0.2366
kappa      0.0000
titv       0.0000
rAC        1.1357
rAG        5.7098
rAT        1.7372
rCG        0.5644
rCT        5.5760
rGT        1.0000
alpha(G)   0.2960
```

-----  
Numbers have been rounded.

- (I): considers only +I models.
- (G): considers only +G models.
- (IG): considers only +I+G models.

\* AIC MODEL SELECTION : Best Model's command line

```
phym1 -i /tmp/jmodeltest954472080326291458.phy -d nt -n 1 -b 0 --run_id TVM+G -m
012314 -f m -c 4 -a e --no_memory_check -o tlr -s BEST
```

```
-----
*                                     *
*           MODEL AVERAGED PHYLOGENY           *
*                                     *
-----
```

```
Selection criterion: . . . . AIC
Confidence interval: . . . . 0.95
Consensus type: . . . . . 50% majority rule
```

Using 2 models in the 0.95 confidence interval = TVM+G GTR+G

Species in order:

1. BrM57-1
2. BrM52-1
3. Br22-1
4. BrK47-1
5. Br53-1
6. BrM55-1
7. Br32-2
8. Br32-1
9. BrM54-1
10. BrM03-1
11. BrM48-1



S2\_jModelTest2\_nuclearSNPs.txt

12. BrK01-1
13. Br48-1
14. BrM23-1
15. BrK55-1
16. BrM17-1
17. BrM21-1
18. BrM46-1
19. BrM11-1
20. BrM02-1
21. BrM45-1
22. BrK60-1
23. BrM27-1
24. BrM51-1
25. BrM60-3
26. BrM56-1
27. Gv10-C-05
28. Gv10-F-02
29. Gv10-F-10
30. Gv10-C-01
31. Gv10-H-05
32. Gv10-C-10
33. Gv10-B-10
34. Gv10-A-01
35. Gv10-F-08
36. Gv10-E-05
37. Gv10-B-02
38. Gv10-H-03
39. Gv10-B-06
40. Gv10-H-07
41. Gv10-A-10
42. Gv10-A-08
43. Vi10-2
44. In527
45. In501a
46. In526
47. In521
48. In553
49. In556
50. In525
51. In534
52. In547
53. In535
54. In501
55. Vi10-3
56. Vi12-1
57. Vi23-1
58. Vi12-3
59. Vi10-5
60. Vi23-4
61. Vi23-5
62. Vi12-5
63. Vi10-1

S2\_jModelTest2\_nuclearSNPs.txt

- 64. BrM22-1
- 65. Br47-1
- 66. Br47-2
- 67. BrM59-1
- 68. BrK04-1
- 69. BrK02-1
- 70. Br22-2
- 71. Br46-1
- 72. Br46-2
- 73. BrK06-1
- 74. Br30-1
- 75. Br30-2
- 76. BrM50-1
- 77. Br26-2
- 78. Br26-1
- 79. Br57-1
- 80. Br57-2

Bipartitions included in the consensus tree

123456789111111111112222222222333333333344444444445555555555666666666677777777778

0123456789012345678901234567890123456789012345678901234567890

```
*****
( 1.0 )
_ _*****
( 1.0 )
_ _***-----
( 1.0 )
_ _**-----
( 1.0 )
_ _ _*****
( 1.0 )
_ _ _ _*****
( 1.0 )
_ _ _ _*****_ _ _ _
( 1.0 )
_ _ _ _**-----
( 1.0 )
_ _ _ _ _*****_ _ _ _ _
( 1.0 )
```

S2\_jModelTest2\_nuclearSNPs.txt

-----  
\*\*\*\*\*  
( 1.0 )  
-----  
\*\*\*\*\*  
( 1.0 )  
-----  
\*\*\*\*\*  
( 1.0 )  
-----  
\*\*\*  
( 1.0 )  
-----  
\*\*  
( 1.0 )  
-----  
\*\*  
( 1.0 )  
-----  
\*\*  
( 1.0 )  
-----  
\*\*  
( 1.0 )  
-----  
\*\*\*\*\*  
( 1.0 )  
-----  
\*\*\*\*\*  
( 1.0 )  
-----  
\*\*\*\*\*  
( 1.0 )  
-----  
\*\*\*\*\*  
( 1.0 )  
-----  
\*\*\*\*\*  
( 1.0 )  
-----  
\*\*  
( 1.0 )  
-----  
\*\*\*  
( 1.0 )  
-----  
\*\*  
( 1.0 )  
-----  
\*\*  
( 1.0 )  
-----  
\*\*\*  
( 1.0 )  
-----  
\*\*  
( 1.0 )  
-----  
\*\*  
( 1.0 )  
-----  
\*\*\*  
( 1.0 )  
-----  
\*\*  
( 1.0 )  
-----

S2\_jModelTest2\_nuclearSNPs.txt

( 1.0 )

-----\*\*\*\*\*-----

( 1.0 )

-----\*\*\*\*\*-----

( 1.0 )

-----\*\*\*\*\*-----

( 1.0 )

-----\*\*\*\*\*-----

( 1.0 )

-----\*\*\*\*\*-----

( 1.0 )

-----\*\*\*-----

( 1.0 )

-----\*\*-----

( 1.0 )

-----\*\*\*-----

( 1.0 )

-----\*\*-----

( 1.0 )

-----\*\*\*\*\*-----

( 1.0 )

-----\*\*\*\*-----

( 1.0 )

-----\*\*-----

( 1.0 )

-----\*\*-----

( 1.0 )

-----\*\*\*\*\*-----

( 1.0 )

-----\*\*\*\*-----

( 1.0 )

-----\*\*\*-----

( 1.0 )

-----\*\*-----

( 1.0 )

S2\_jModelTest2\_nuclearSNPs.txt

-----\*\*\*\*\*-----  
( 1.0 )  
-----\*\*\*\*\*-----  
( 1.0 )  
-----\*\*\*\*\*-----  
( 1.0 )  
-----\*\*\*\*\*-----  
( 1.0 )  
-----\*\*-----  
( 1.0 )  
-----\*\*\*-----  
( 1.0 )  
-----\*\*\*-----  
( 1.0 )  
-----\*\*-----  
( 1.0 )  
-----\*\*\*\*\*-----  
( 1.0 )  
-----\*\*\*-----  
( 1.0 )  
-----\*\*-----  
( 1.0 )  
-----\*\*-----  
( 1.0 )  
-----\*\*\*\*\*-----  
( 1.0 )  
-----\*\*\*\*\*-----  
( 1.0 )  
-----\*\*\*\*\*-----  
( 1.0 )  
-----\*\*-----  
( 1.0 )  
-----\*\*\*\*-----  
( 1.0 )

S2\_jModelTest2\_nuclearSNPs.txt

-----\*\*\*-----  
( 1.0 )  
-----\*\*-----  
( 1.0 )  
-----\*\*-----  
( 1.0 )  
-----\*\*\*\*\*-----  
( 1.0 )  
-----\*\*\*-----  
( 1.0 )  
-----\*\*-----  
( 1.0 )  
-----\*\*\*-----  
( 1.0 )  
-----\*\*-----  
( 1.0 )  
-----\*\*\*\*\*-----  
( 1.0 )  
-----\*\*\*\*\*-----  
( 1.0 )  
-----\*\*-----  
( 1.0 )  
-----\*\*\*-----  
( 1.0 )  
-----\*\*-----  
( 1.0 )  
-----\*\*\*\*\*-----  
( 1.0 )  
-----\*\*\*\*-----  
( 1.0 )  
-----\*\*-----  
( 1.0 )  
-----\*\*-----  
( 1.0 )

S2\_jModelTest2\_nuclearSNPs.txt

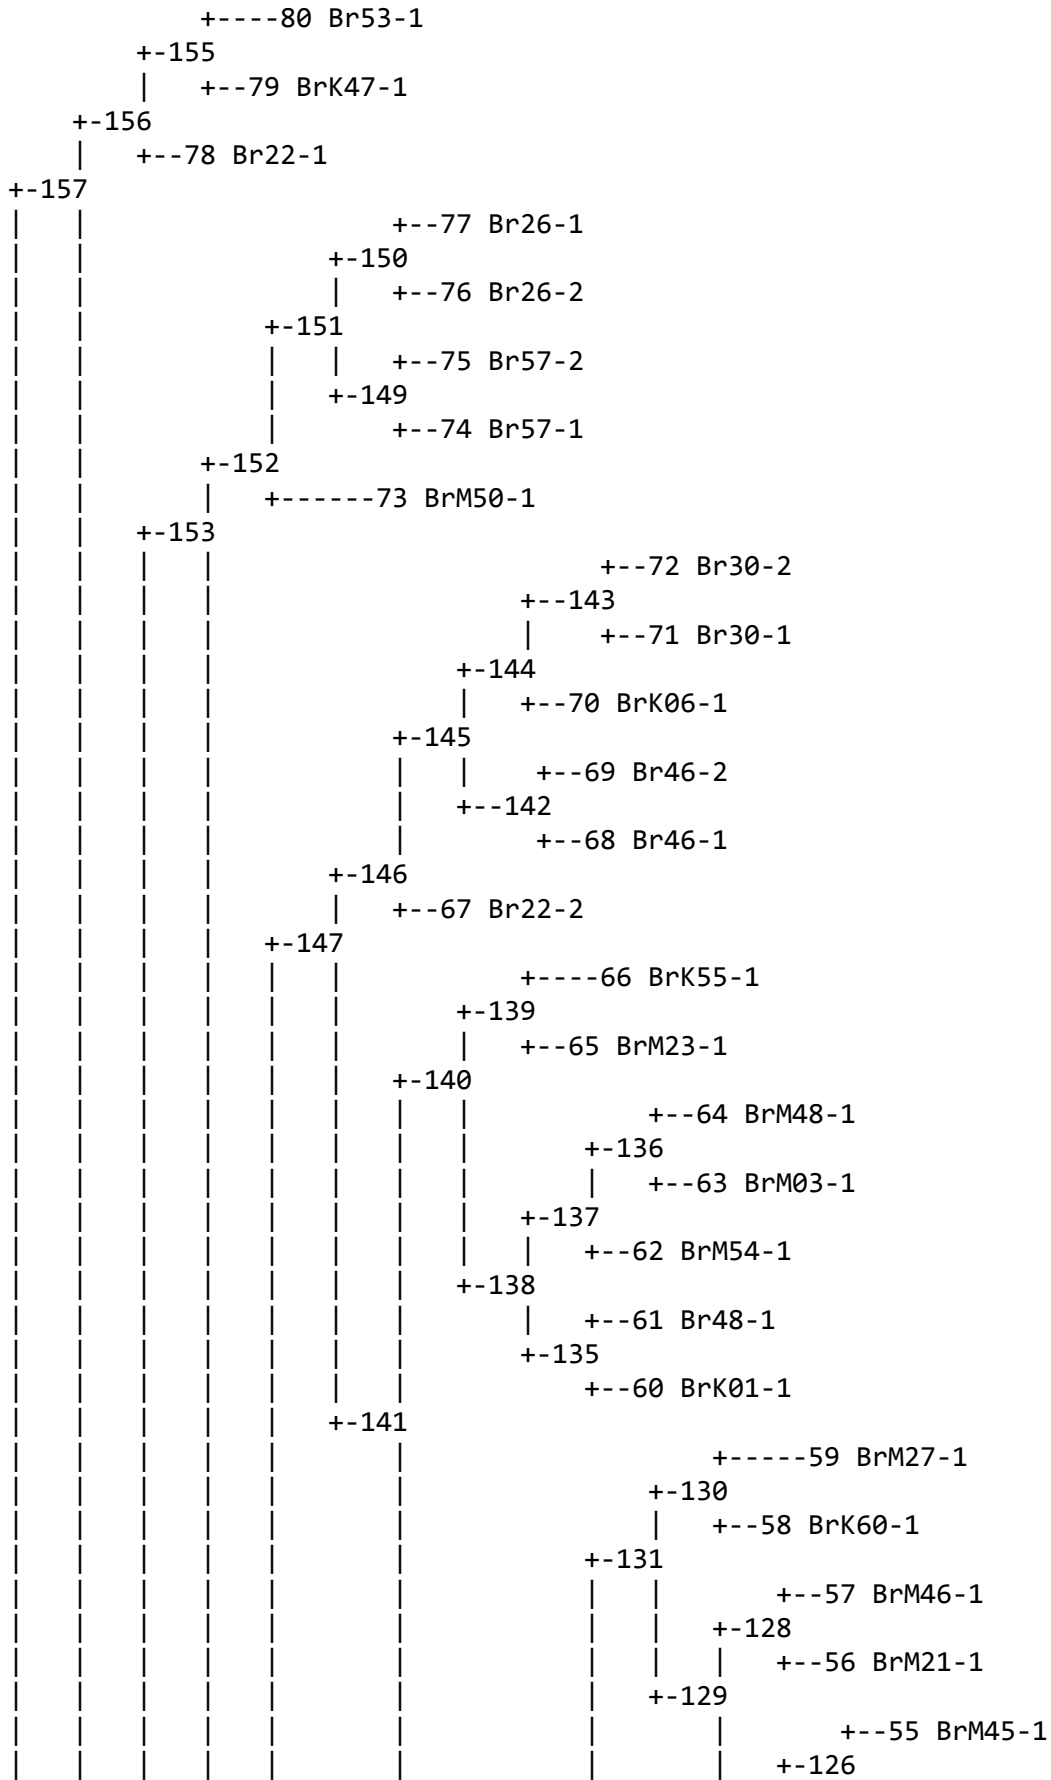

S2\_jModelTest2\_nuclearSNPs.txt

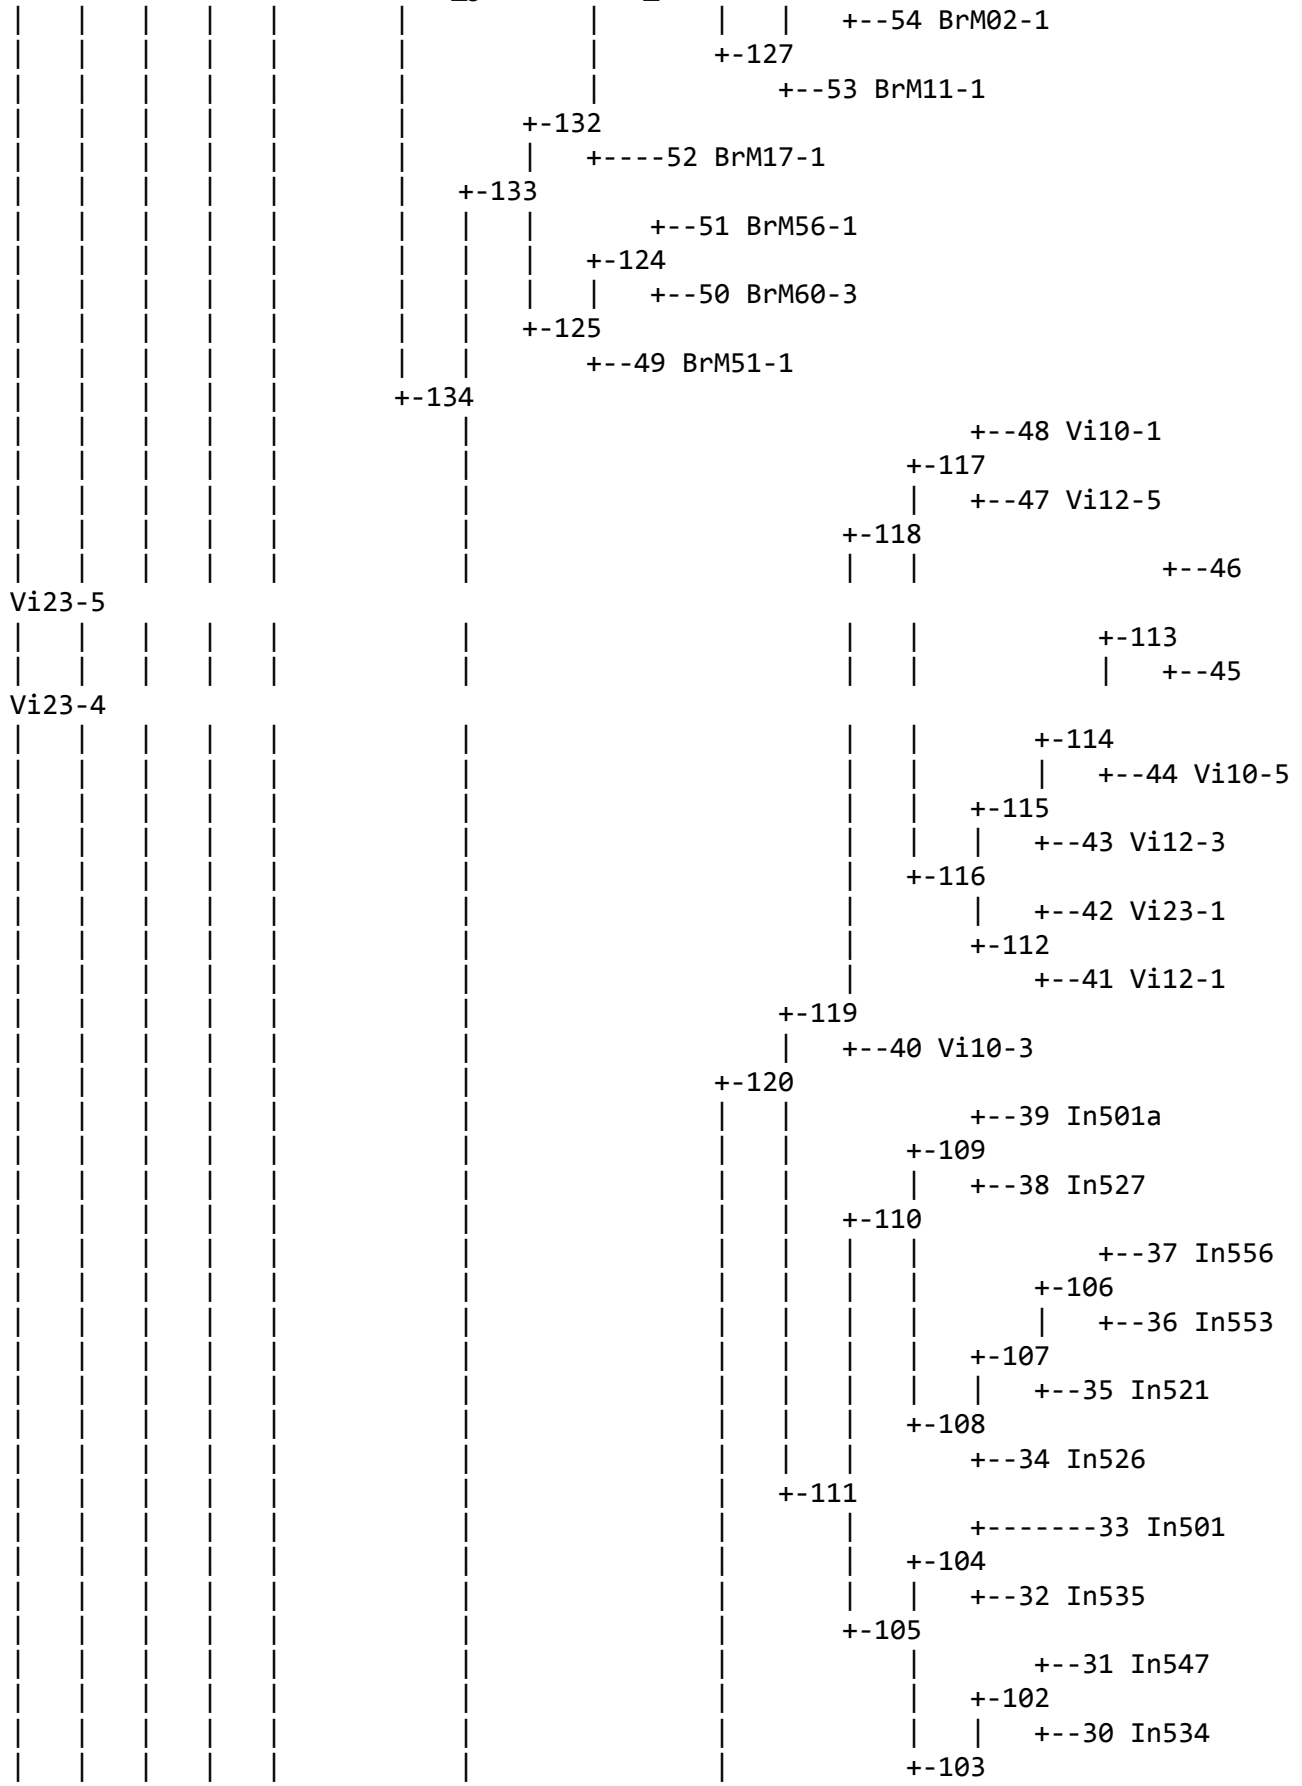



S2\_jModelTest2\_nuclearSNPs.txt

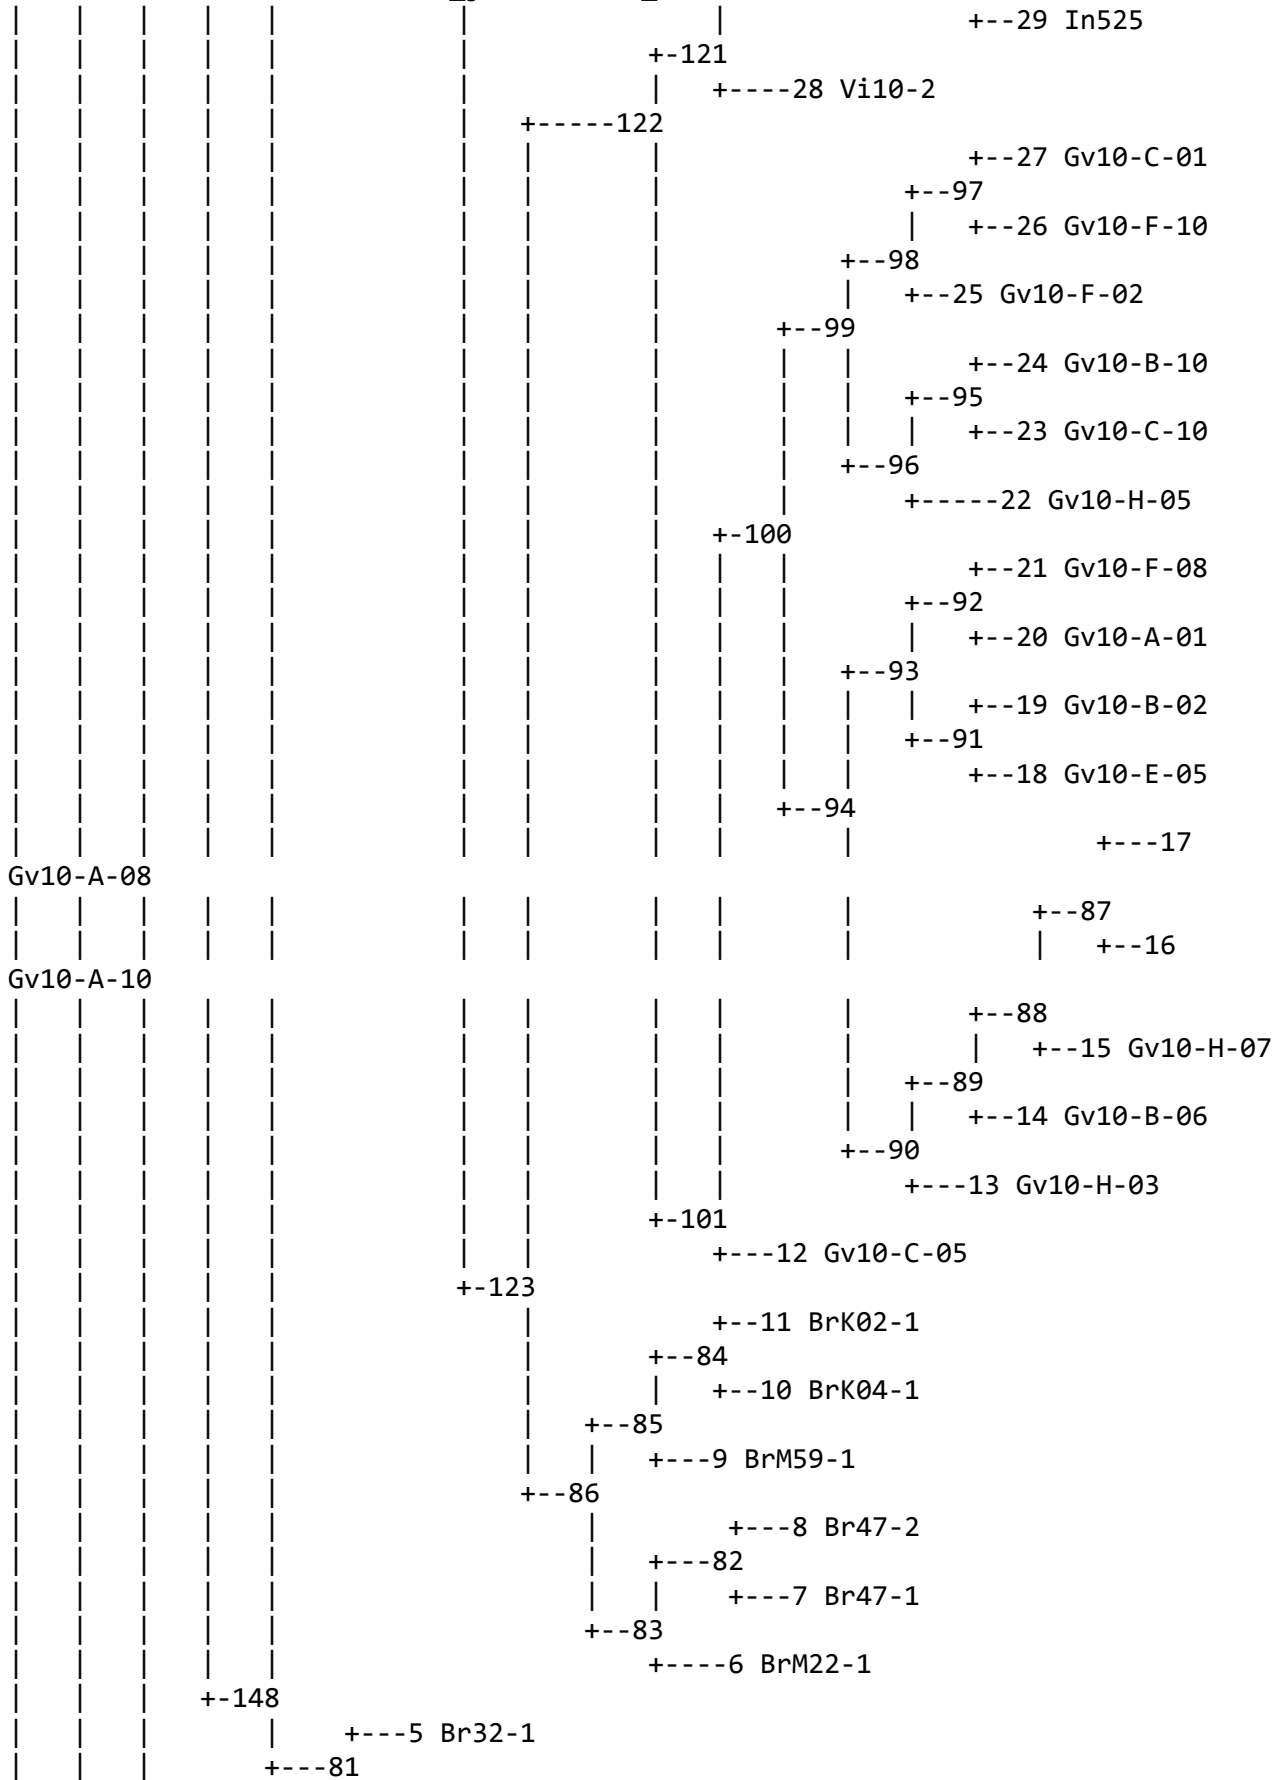

S2\_jModelTest2\_nuclearSNPs.txt

```

|   |   |
|   +-154
|       +-----3 BrM55-1
|
+----2 BrM52-1
|
+-----1 BrM57-1

```

```

(BrM57-1:0.051848,BrM52-1:0.024815,(((BrM55-1:0.040002,(((Br32-2:0.012404,Br32-1:0.006430)1.00:0.041546,((((((BrM22-1:0.036591,(Br47-1:0.002761,Br47-2:0.003817)1.00:0.042946)1.00:0.008688,(BrM59-1:0.021687,(BrK04-1:0.024840,BrK02-1:0.035446)1.00:0.010895)1.00:0.007650)1.00:0.006559,((Gv10-C-05:0.037425,((Gv10-H-03:0.038713,(Gv10-B-06:0.035132,(Gv10-H-07:0.021675,(Gv10-A-10:0.022479,Gv10-A-08:0.041875)1.00:0.012478)1.00:0.008806)1.00:0.003831)1.00:0.011389,((Gv10-E-05:0.021550,Gv10-B-02:0.025659)1.00:0.020254,(Gv10-A-01:0.025764,Gv10-F-08:0.026507)1.00:0.013175)1.00:0.007268)1.00:0.009645,((Gv10-H-05:0.050692,(Gv10-C-10:0.030513,Gv10-B-10:0.026500)1.00:0.008688)1.00:0.014956,(Gv10-F-02:0.035883,(Gv10-F-10:0.020188,Gv10-C-01:0.025740)1.00:0.006218)1.00:0.008780)1.00:0.009999)1.00:0.019293)1.00:0.018332,(Vi10-2:0.048238,(((In525:0.032798,(In534:0.021076,In547:0.025134)1.00:0.009959)1.00:0.007947,(In535:0.025287,In501:0.070932)1.00:0.013164)1.00:0.006532,((In526:0.026792,(In521:0.029859,(In553:0.019727,In556:0.018035)1.00:0.005785)1.00:0.015779)1.00:0.007022,(In527:0.028811,In501a:0.035318)1.00:0.005475)1.00:0.008125)1.00:0.029345,(Vi10-3:0.032904,(((Vi12-1:0.028560,Vi23-1:0.030108)1.00:0.015189,(Vi12-3:0.034654,(Vi10-5:0.025213,(Vi23-4:0.002750,Vi23-5:0.003462)1.00:0.035889)1.00:0.011144)1.00:0.006301)1.00:0.007194,(Vi12-5:0.030246,Vi10-1:0.024043)1.00:0.013171)1.00:0.009582)1.00:0.009637)1.00:0.014949)1.00:0.009283)1.00:0.059624)1.00:0.006668,((BrM51-1:0.028582,(BrM60-3:0.032024,BrM56-1:0.023818)1.00:0.009790)1.00:0.012414,(BrM17-1:0.047907,(((BrM11-1:0.024473,(BrM02-1:0.034265,BrM45-1:0.021596)1.00:0.012788)1.00:0.009411,(BrM21-1:0.020146,BrM46-1:0.018502)1.00:0.009550)1.00:0.011332,(BrK60-1:0.027680,BrM27-1:0.053157)1.00:0.011269)1.00:0.004301)1.00:0.015422)1.00:0.008326)1.00:0.008111,(((BrK01-1:0.030762,Br48-1:0.028139)1.00:0.016636,(BrM54-1:0.027014,(BrM03-1:0.024388,BrM48-1:0.015711)1.00:0.017126)1.00:0.003967)1.00:0.006525,(BrM23-1:0.029536,BrK55-1:0.043542)1.00:0.008511)1.00:0.008740)1.00:0.004546,(Br22-2:0.031574,((Br46-1:0.005946,Br46-2:0.002611)1.00:0.040798,(BrK06-1:0.032159,(Br30-1:0.006317,Br30-2:0.001763)1.00:0.041332)1.00:0.012013)1.00:0.012669)1.00:0.012233)1.00:0.004328)1.00:0.005710,(BrM50-1:0.061264,((Br57-1:0.001190,Br57-2:0.006039)1.00:0.019544,(Br26-2:0.001957,Br26-1:0.009286)1.00:0.023309)1.00:0.031239)1.00:0.017826)1.00:0.010045)1.00:0.013030,(Br22-1:0.026676,(BrK47-1:0.027020,Br53-1:0.048154)1.00:0.022088)1.00:0.018719)1.00:0.031119);

```

Note: this tree is unrooted. Branch lengths are the expected number of substitutions per site. Labels next to parentheses represent phylogenetic uncertainty due to model selection (see documentation)
